# Supplementary material for: Mechanistic insight into the dehydrogenation reaction catalyzed by an MLC catalyst with dual ancillary ligand sites
Source: Royal Society of Chemistry journal article supplement (doi:10.1039/d4qo01767f), 2024-10-29
Supplement: d4qo01767f1.pdf [file d4qo01767f1.pdf]

## Electronic Supplementary Information

### Mechanistic insight into the dehydrogenation reaction catalyzed by the MLC catalyst with dual ancillary ligand sites

Gui-Xiang Zhou and Cheng Hou\*

School of Chemistry and Pharmaceutical Sciences, State Key Laboratory for  
Chemistry and Molecular Engineering of Medicinal Resources, Guangxi Normal  
University, Guilin, 541004, P. R. China

*\*Author to whom correspondence should be addressed at:  
houcheng@gxnu.edu.cn*

#### Table of Contents

|                                                                                                                                                 |     |
|-------------------------------------------------------------------------------------------------------------------------------------------------|-----|
| 1. The comparison of free energy barriers using different functionals. ....                                                                     | S2  |
| 2. The change in free energy introduced by the inclusion of water clusters .....                                                                | S3  |
| 3. Free energy diagram of the proton-shuttle transition state involving water molecules. S4                                                     |     |
| 4. The TDI and TDTS of the reaction pathway considering the energetic span model .....                                                          | S5  |
| 5. The IRC of transition states TS4 <sub>a</sub> and TS4 <sub>b</sub> .....                                                                     | S6  |
| 6. Comparison of results calculated at the M06-L/def2-TZVP level and the<br>B3LYP/LANL2DZ (for Ru)/6-31+G(d,p) (for non-metal atoms) level..... | S7  |
| 7. Rationale for choosing intermediate IM2 as the starting point .....                                                                          | S8  |
| 8. Geometric structure diagrams.....                                                                                                            | S9  |
| 9. The DFT calculated energies of all optimized structures.....                                                                                 | S11 |
| 10. The cartesian coordinates for all structures .....                                                                                          | S12 |

## 1. The comparison of free energy barriers using different functionals.

**Table S1.** The comparison of free energy barrier using different functionals (kcal/mol).

| Functionals      | M06-L | TPSSH | M06  | PBE1PBE |
|------------------|-------|-------|------|---------|
| IM2              | 0.0   | 0.0   | 0.0  | 0.0     |
| TS6              | 19.9  | 22.2  | 21.8 | 22.4    |
| TS4 <sub>b</sub> | 23.4  | 25.0  | 30.6 | 29.4    |

In order to select appropriate functional for our calculation, we compare a series of functionals which are widely used in the computational studies relevant to dehydrogenation reaction. The rate-determining transition states and intermediates were calculated using different functionals. The results are shown in Table S1. The relative reaction activation energy and mechanism selectivity calculated by different functionals is basically the same trend. Based on these results, we chose M06-L as the functional considering the computational expense and accuracy.

## 2. The change in free energy introduced by the inclusion of water clusters

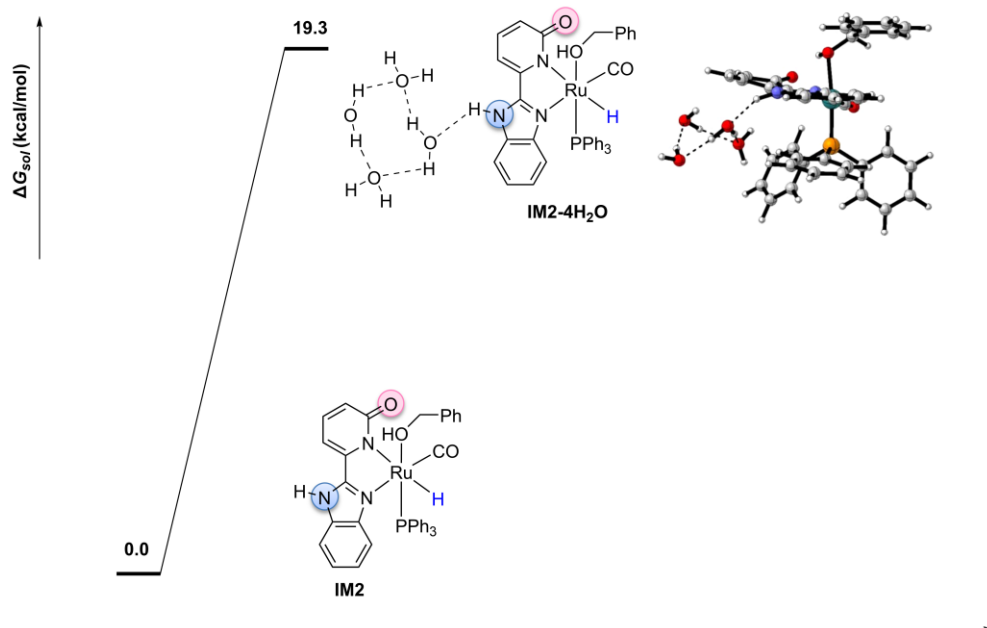

**Figure S1.** The free energy diagram of intermediate **IM2** with four water molecules

we explored the possibility of explicit water clusters binding to intermediate **IM2**. The computational results indicate that when **IM2** is bound to a water tetramer, the free energy increases by 19.3 kcal/mol, leading to a significant rise in the energy barrier compared to the transition state without water. Thus, this pathway was ruled out.

### 3. Free energy diagram of the proton-shuttle transition state involving water molecules

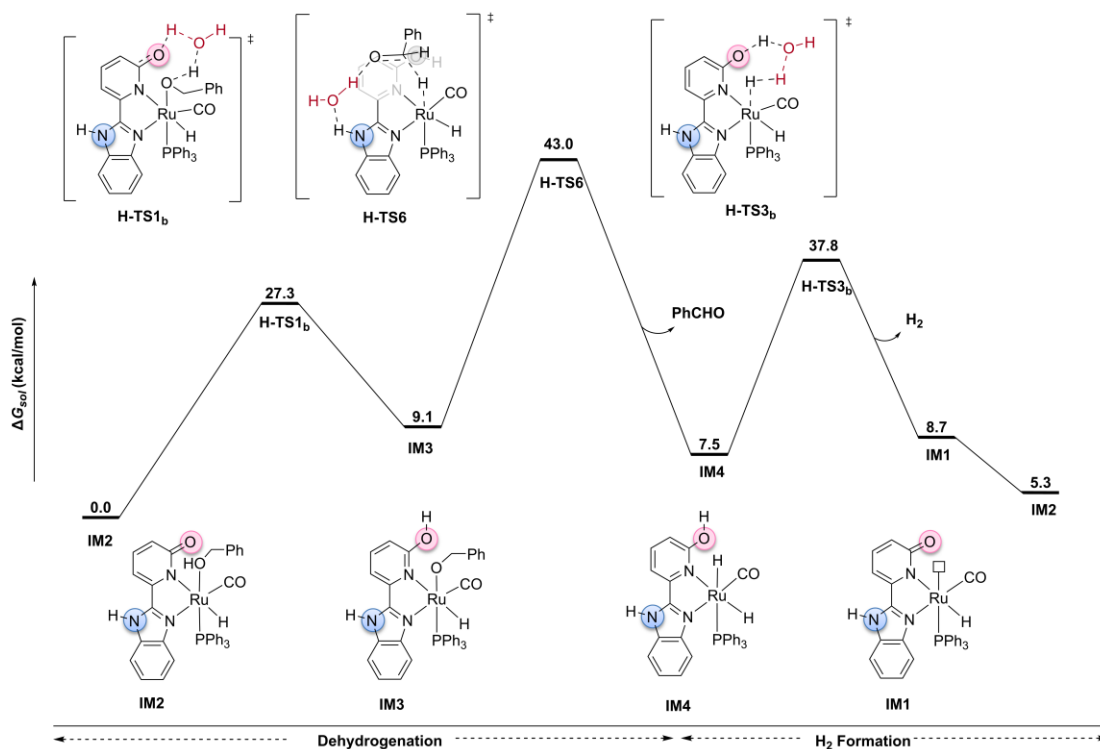

**Figure S2.** The free energy diagram of the reaction involving water

Additionally, we further considered the potential of a proton-shuttle transition state facilitated by water molecules. As shown in the figure, when water molecules participate in the reaction, the free energy barrier rises to 43.0 kcal/mol, indicating a substantial increase in energy. Therefore, although the ruthenium complex tends to coordinate with water molecules, in solution it is more likely to remain in its free state and is less prone to participate in proton transfer processes.

#### 4. The TDI and TDTS of the reaction pathway considering the energetic span model

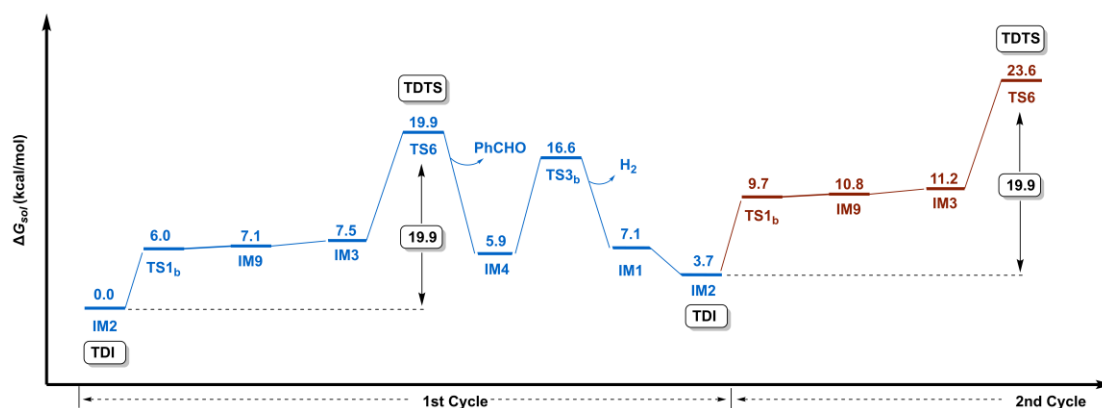

**Figure S3.** The potential energy diagram considering the energetic span model

As shown in the figure, the overall reaction has a free energy of 3.7 kcal/mol, making it an endothermic process. Therefore, the TOF-determining intermediate should be the lowest point on the free energy profile, which corresponds to **IM2**, while the TOF-determining transition state is **TS6**. The energy barrier calculation does not extend into the next catalytic cycle.

## 5. The IRC of transition states TS4<sub>a</sub> and TS4<sub>b</sub>

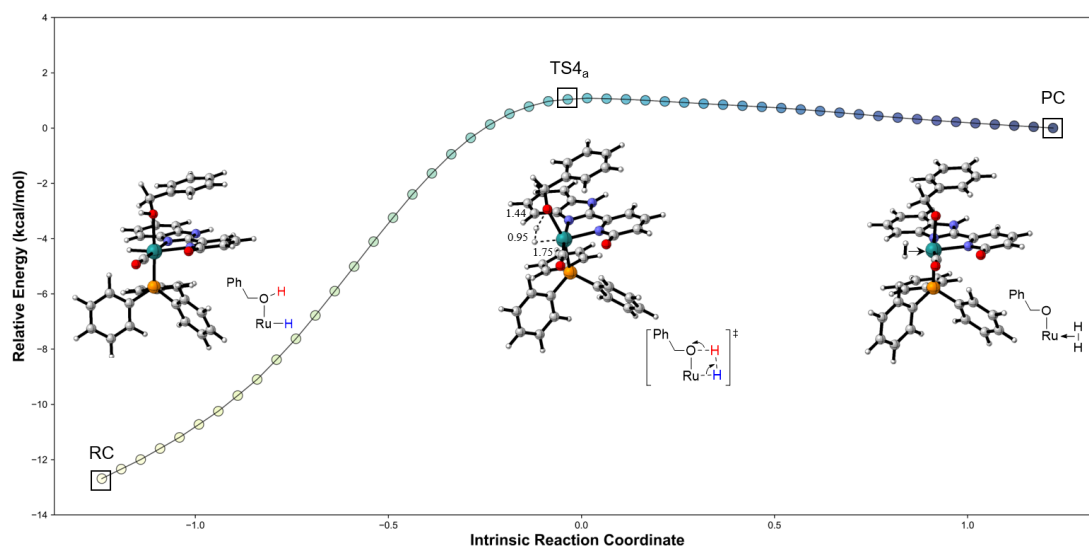

**Figure S4.** Schematic diagram of the IRC curve for transition state TS4<sub>a</sub>

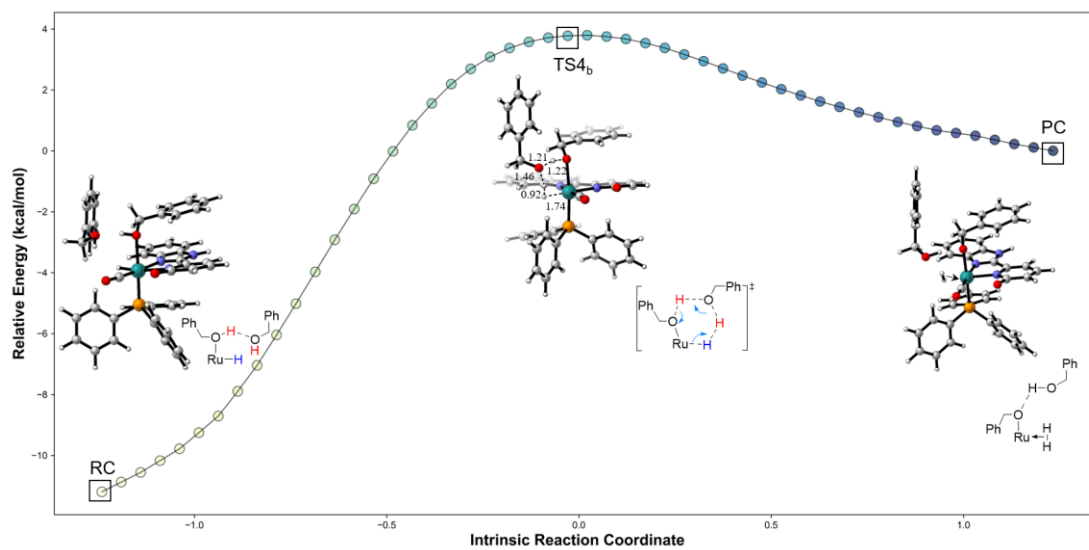

**Figure S5.** Schematic diagram of the IRC curve for the proton shuttle transition state TS4<sub>b</sub>

6. Comparison of results calculated at the M06-L/def2-TZVP level and the B3LYP/LANL2DZ (for Ru)/6-31+G(d,p) (for non-metal atoms) level

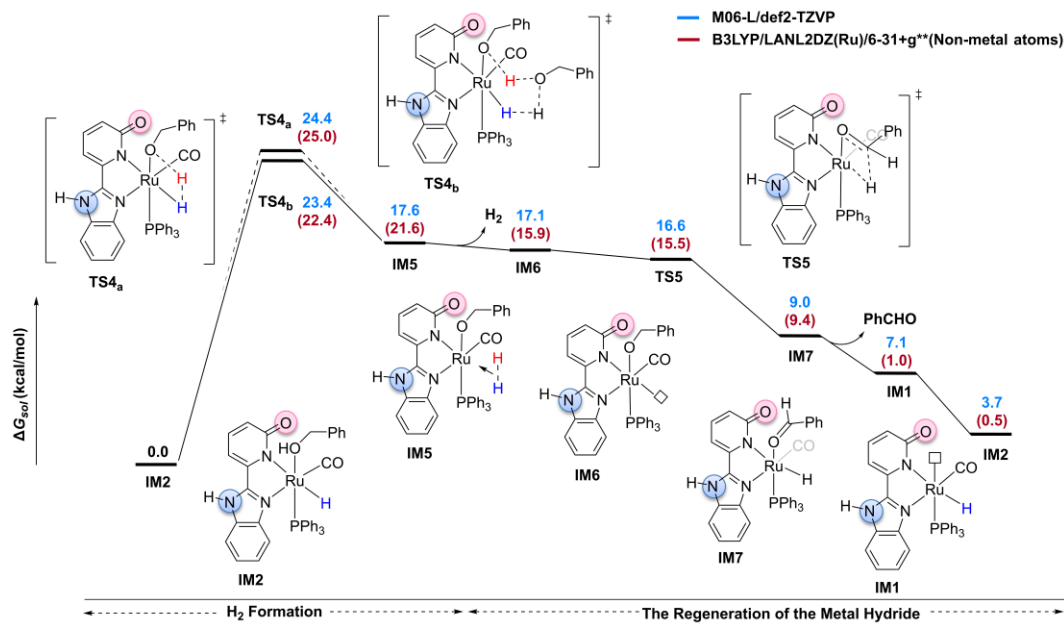

Figure S6. The Free energy diagram for the inner-sphere mechanism.

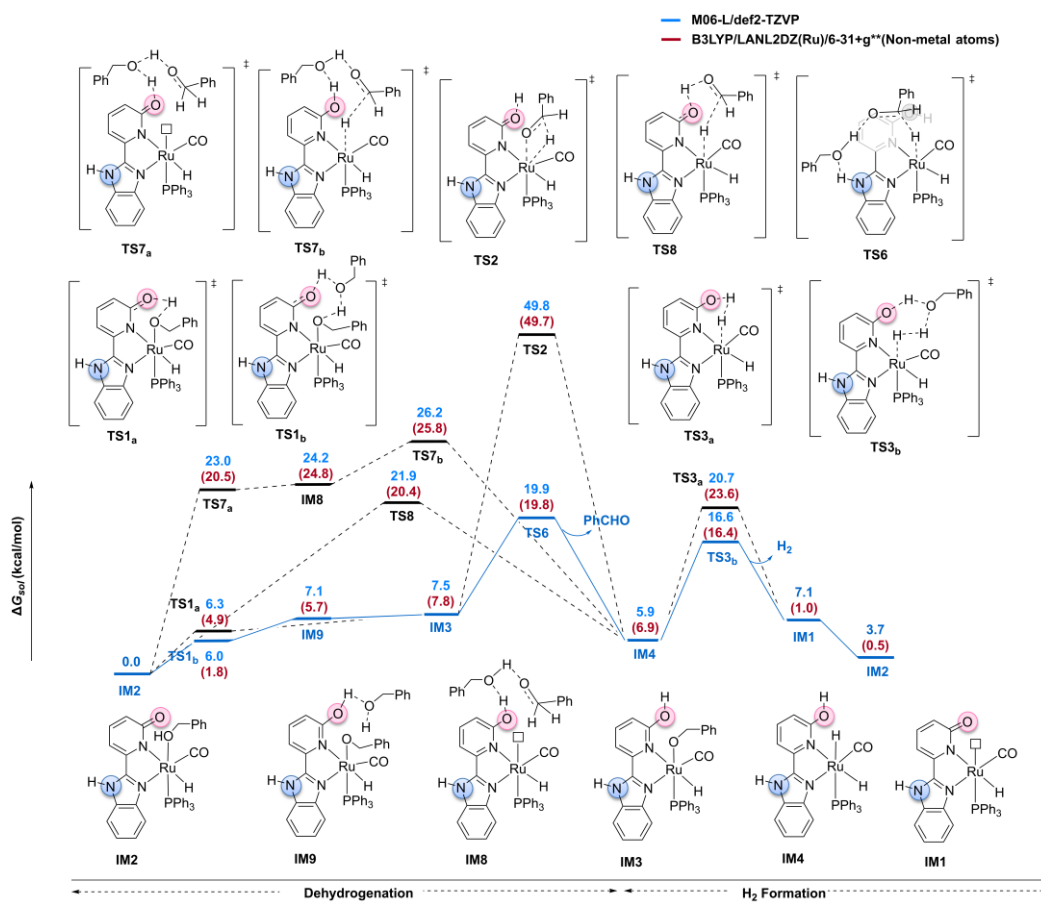

Figure S7. The Free energy diagram for the outer-sphere mechanism.

## 7. Rationale for choosing intermediate IM2 as the starting point

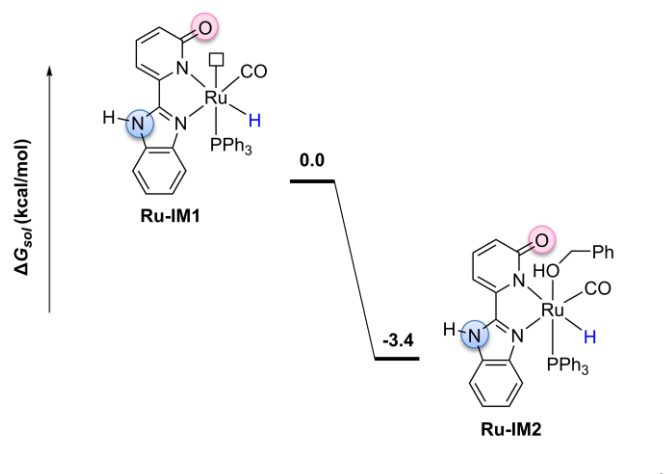

**Figure S8.** The free energy diagram to examine the stability of intermediate IM2 as the starting point

The reaction free energy for the coordination of the alcohol molecule was calculated to be -3.4 kcal/mol, indicating that this process is exothermic and stabilizes intermediate IM2.



## 8. Geometric structure diagrams

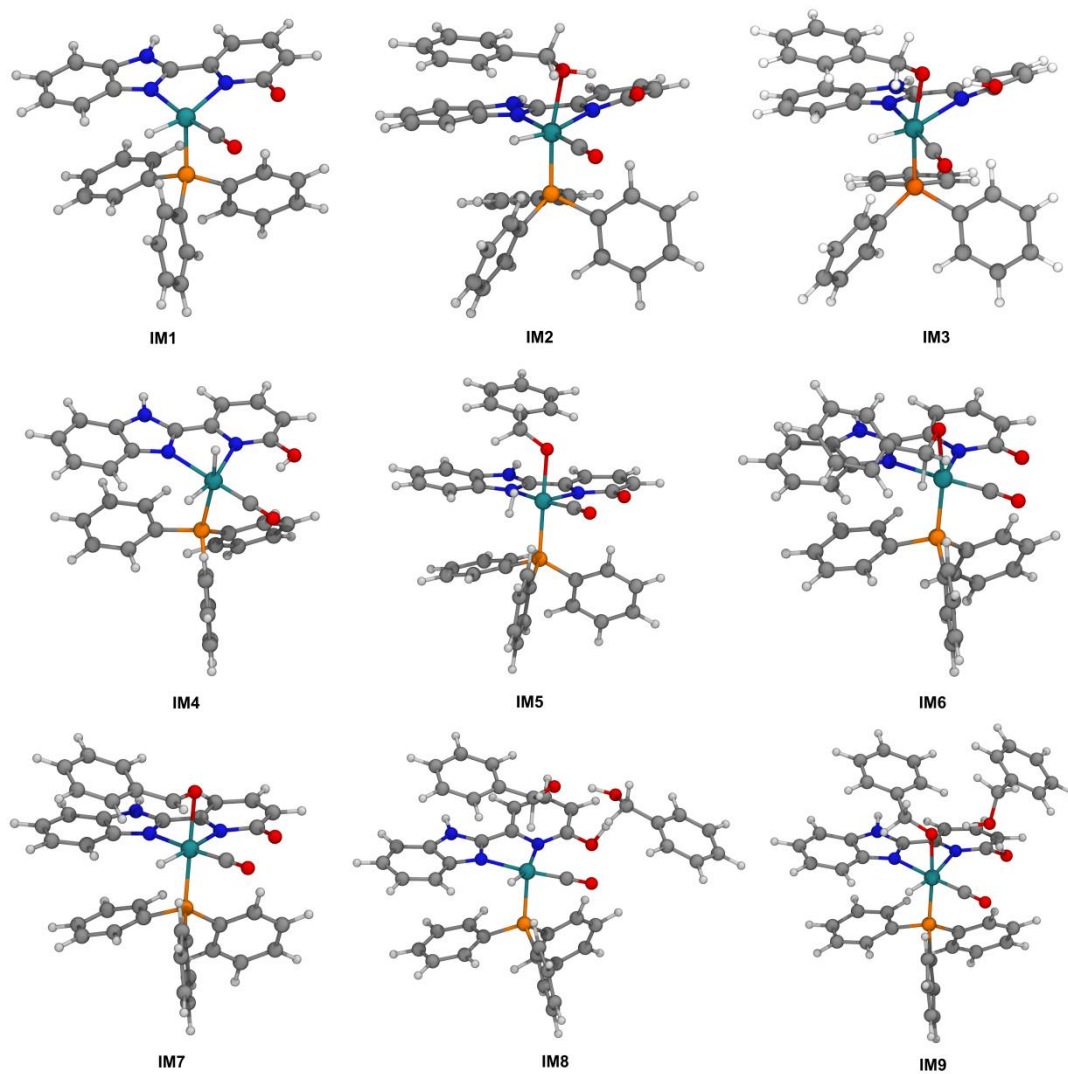

**Figure S9.** Geometric Structure Diagrams of Intermediates

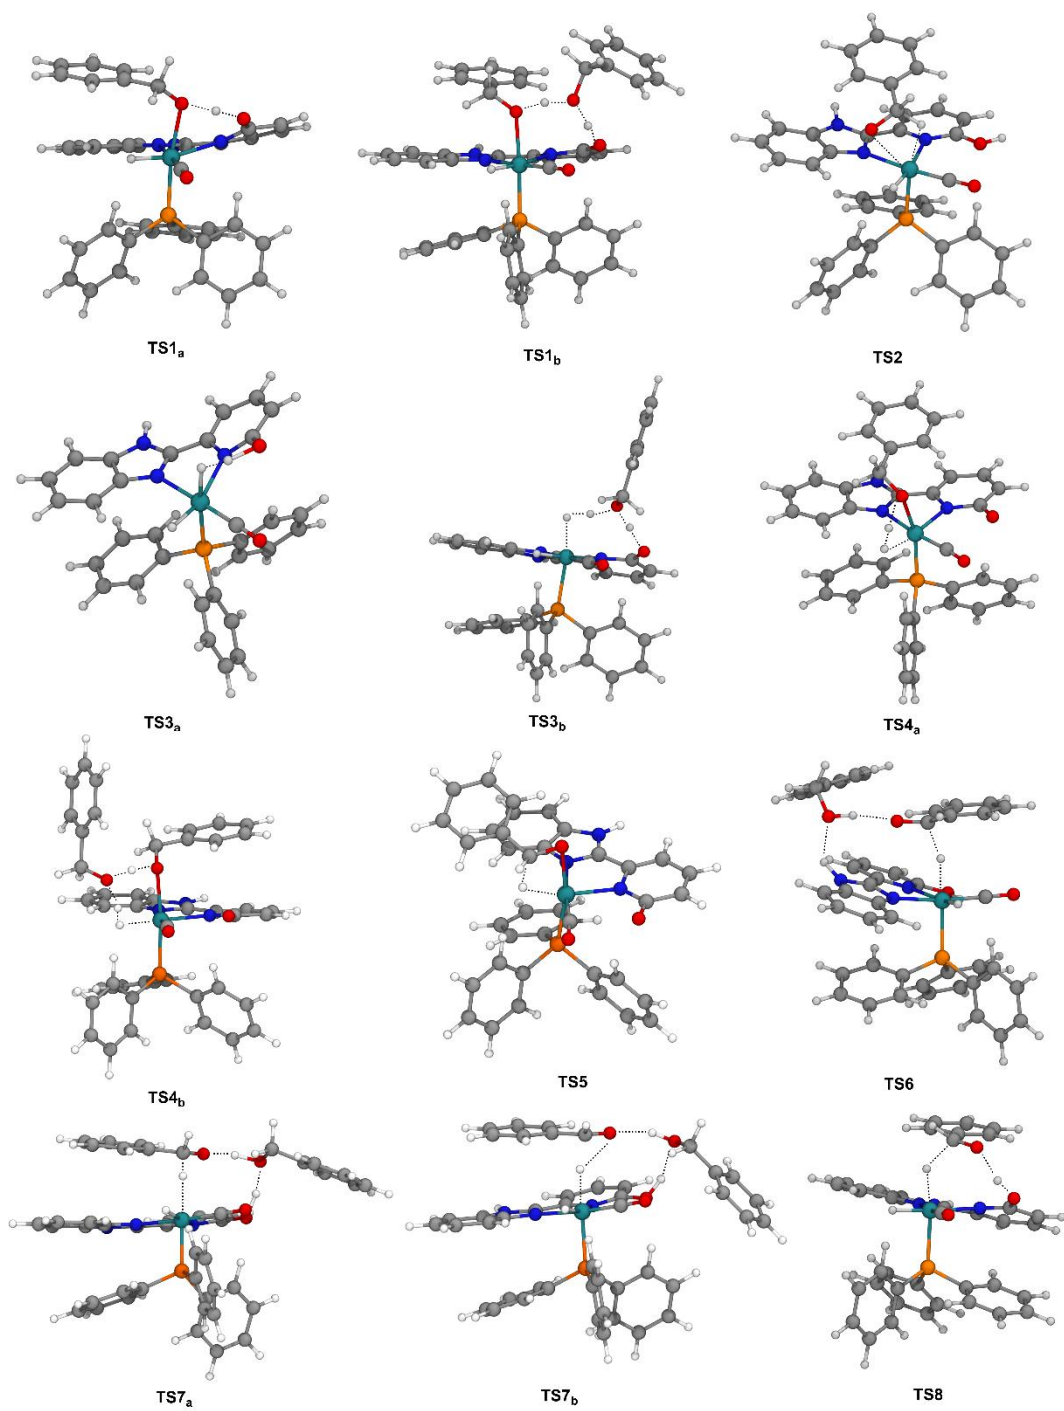

**Figure S10.** Geometric Structure Diagrams of Transition States

## 9 The DFT calculated energies of all optimized structures

**Table S2.** The DFT calculated energies of all optimized structures

| Species          | G <sub>C</sub><br>hartree | G(gas)<br>hartree | E <sub>SP</sub> + G <sub>SOL</sub><br>hartree | Final G<br>hartree | <i>i</i> (cm <sup>-1</sup> ) |
|------------------|---------------------------|-------------------|-----------------------------------------------|--------------------|------------------------------|
| PhOH             | 0.087871                  | -346.374033       | -346.854769763                                | -346.7600463       |                              |
| PhCHO            | 0.066621                  | -345.200148       | -345.657401783                                | -345.5839283       |                              |
| H <sub>2</sub>   | -0.006357                 | -1.168683         | -1.17068990259                                | -1.170194422       |                              |
| IM1              | 0.374643                  | -1945.129347      | -1947.30806299                                | -1946.926568       |                              |
| IM2              | 0.494703                  | -2291.523907      | -2294.19354714                                | -2293.691992       |                              |
| IM3              | 0.493337                  | -2291.512973      | -2294.18018168                                | -2293.679992       |                              |
| IM4              | 0.392114                  | -1946.305225      | -1948.49760961                                | -1948.098643       |                              |
| IM5              | 0.493842                  | -2291.496636      | -2294.16464403                                | -2293.66395        |                              |
| IM6              | 0.473248                  | -2290.32514       | -2292.97463577                                | -2292.494535       |                              |
| IM7              | 0.472516                  | -2290.338334      | -2292.98689778                                | -2292.507529       |                              |
| IM8              | 0.607571                  | -2637.869194      | -2641.02784268                                | -2640.413419       |                              |
| IM9              | 0.614666                  | -2637.900903      | -2641.06225805                                | -2640.44074        |                              |
| TS1 <sub>a</sub> | 0.490452                  | -2291.515431      | -2294.17924599                                | -2293.681942       | -569.27                      |
| TS1 <sub>b</sub> | 0.609301                  | -2637.902853      | -2641.05862923                                | -2640.442476       | -868.95                      |
| TS2              | 0.490745                  | -2291.441932      | -2294.11030643                                | -2293.612709       | -409.53                      |
| TS3 <sub>a</sub> | 0.389219                  | -1946.282363      | -1948.47113013                                | -1948.075059       | -1448.01                     |
| TS3 <sub>b</sub> | 0.502272                  | -2292.670364      | -2295.35084115                                | -2294.841717       | -1352.84                     |
| TS4 <sub>a</sub> | 0.492462                  | -2291.489501      | -2294.15406366                                | -2293.654749       | -880.88                      |
| TS4 <sub>b</sub> | 0.60638                   | -2637.86829       | -2641.0263193                                 | -2640.413087       | -938.67                      |
| TS5              | 0.471335                  | -2290.325877      | -2292.97361061                                | -2292.495423       | -497.19                      |
| TS6              | 0.604025                  | -2637.876474      | -2641.03112788                                | -2640.42025        | -415.20                      |
| TS7 <sub>a</sub> | 0.604363                  | -2637.870832      | -2641.02656161                                | -2640.415346       | -878.17                      |
| TS7 <sub>b</sub> | 0.605765                  | -2637.867778      | -2641.02293548                                | -2640.410318       | -428.06                      |
| TS8              | 0.489789                  | -2291.489221      | -2294.15368153                                | -2293.65704        | -559.07                      |

- The  $G_C$  designate the Gibbs Free Energy at the M06-L/def2-SVP level.
- The  $G(\text{gas})$  designate Gibbs Free Energy in the gas phase at the M06-L/def2-SVP level.
- The  $E_{SP} + G_{SOL}$  designates the sum of single point energy at the M06-L/def2-TZVP level and the solvation free energy calculated by SMD continuum solvent mode.
- The **Final G** designates the sum of  $E_{SP} + G_{SOL}$  and  $G_C$ .
- The *i* designates the imaginary frequency of transition states

## 10. The cartesian coordinates for all structures

|                |             |             |             |     |             |             |             |   |             |             |             |
|----------------|-------------|-------------|-------------|-----|-------------|-------------|-------------|---|-------------|-------------|-------------|
| H <sub>2</sub> |             |             |             | C   | -1.73319300 | 1.05973000  | 0.00002400  | C | -3.28700900 | -2.26101800 | 0.67811600  |
| H              | 0.00000000  | 0.00000000  | 0.37724500  | C   | -0.36010400 | 1.29073400  | -0.00003400 | H | -3.16996400 | -1.91242600 | 1.70759900  |
| H              | 0.00000000  | 0.00000000  | -0.37724500 | C   | 0.53573000  | 0.21470100  | -0.00002500 | C | -2.44583500 | -1.77030700 | -0.33230000 |
|                |             |             |             | C   | 0.04622300  | -1.09977000 | -0.00000500 | C | 2.46388100  | 1.29363000  | -0.17484000 |
| Benzyl alcohol |             |             |             | C   | -1.32364400 | -1.32987600 | -0.00001100 | C | -1.85264700 | 0.48025400  | 1.37901400  |
| C              | 1.87581600  | 1.00047500  | 0.00000100  | C   | -2.21293600 | -0.25049600 | 0.00002200  | C | -4.28065800 | -3.18960700 | 0.38090200  |
| C              | 0.51632900  | 1.29858700  | -0.00002900 | H   | -2.43245800 | 1.89863200  | 0.00004600  | H | -4.92840600 | -3.56242900 | 1.17761600  |
| C              | -0.44039600 | 0.27564300  | -0.00002000 | H   | 0.03186400  | 2.31270800  | -0.00008000 | C | 2.89021000  | -2.06463200 | -1.23678400 |
| C              | -0.00936500 | -1.05282800 | -0.00000200 | H   | 0.76786300  | -1.92041500 | -0.00000500 | H | 2.03097100  | -2.41996200 | -1.80946100 |
| C              | 1.35377400  | -1.35152200 | 0.00000300  | H   | -1.70839500 | -2.35221600 | -0.00004600 | C | 1.00827400  | -0.97979200 | 1.88663300  |
| C              | 2.30026900  | -0.32937600 | 0.00001100  | H   | -3.29000000 | -0.43439400 | 0.00002800  | H | 0.92210200  | 0.09713200  | 2.06866200  |
| H              | 2.60961700  | 1.81016400  | 0.00001400  | C   | 1.99010600  | 0.46506100  | 0.00000600  | C | -1.70754500 | 0.85575000  | -2.26711900 |
| H              | 0.18875100  | 2.34328000  | -0.00005100 | O   | 2.83887800  | -0.39500500 | 0.00001700  | C | 0.09821800  | -1.61305500 | 1.02626500  |
| H              | -0.75529800 | -1.84869500 | 0.00001800  | H   | 2.26701900  | 1.55522600  | 0.00005500  | C | 2.02510700  | -1.70806100 | 2.49673300  |
| H              | 1.67790400  | -2.39527100 | 0.00000700  |     |             |             |             | H | 2.73414400  | -1.20251800 | 3.15753400  |
| H              | 3.36693900  | -0.56539100 | 0.00002800  | IM1 |             |             |             | C | 0.22170400  | -2.98848300 | 0.79722400  |
| C              | -1.90095300 | 0.62176700  | 0.00003900  | P   | -1.10066500 | -0.59337000 | 0.09277400  | H | -0.47747300 | -3.49325600 | 0.12396800  |
| O              | -2.67819800 | -0.54401500 | -0.00005100 | O   | -2.74375900 | 1.02779900  | -2.76378900 | C | 3.99433400  | -2.86689900 | -0.97115400 |
| H              | -2.11542900 | 1.25897000  | 0.88345900  | O   | -1.40149100 | 3.57118600  | -1.33223000 | H | 4.01481000  | -3.89232800 | -1.34634600 |
| H              | -2.11549500 | 1.25917500  | -0.88322100 | N   | 1.97117300  | 0.24704000  | -0.82954800 | C | 0.17949900  | 4.78354400  | -0.06569400 |
| H              | -3.60424600 | -0.28659000 | 0.00013500  | N   | 3.69062100  | 1.00948300  | 0.34895900  | C | -2.41137700 | 1.70039800  | 0.97811600  |
|                |             |             |             | H   | 4.26931200  | 1.65581400  | 0.86812900  | H | -2.36497800 | 2.02012800  | -0.06690300 |
| Benzaldehyde   |             |             |             | N   | 0.50470500  | 2.46776500  | -0.69113600 | C | 2.21395000  | 3.66241300  | 0.55163600  |

|   |             |             |             |     |             |             |             |   |             |             |             |
|---|-------------|-------------|-------------|-----|-------------|-------------|-------------|---|-------------|-------------|-------------|
| H | 3.19929500  | 3.66514700  | 1.02115400  | H   | -1.97833200 | -1.83999400 | -2.43647000 | C | 0.55348700  | -1.20965300 | -2.39334200 |
| C | 2.14180700  | -3.07960400 | 2.26306400  | C   | -3.62656500 | -3.14776500 | -1.94003800 | C | 1.52764900  | 1.24628500  | 1.31244700  |
| H | 2.94413500  | -3.64936300 | 2.73769500  | H   | -3.76086800 | -3.48547900 | -2.97007400 | C | 2.27331300  | 0.80883000  | 3.58203900  |
| C | 1.71563200  | 2.53407500  | -0.08163700 | Ru  | -0.06917000 | 0.49378300  | -1.52715700 | H | 2.86646600  | 0.21004300  | 4.27781900  |
| C | -1.89264900 | 0.12154000  | 2.73606200  | H   | -0.07565700 | -0.95715800 | -2.24568100 | C | 0.76012800  | 2.31776000  | 1.79368300  |
| H | -1.45560300 | -0.82388600 | 3.07036400  | H   | -0.47285200 | 5.65847300  | -0.08602400 | H | 0.15140500  | 2.90717100  | 1.10120200  |
| C | -0.31774000 | 3.59853100  | -0.74702600 |     |             |             |             | C | -3.44001900 | 2.81505800  | 1.39976300  |
| C | 2.90646800  | -0.76068500 | -0.73784100 | IM2 |             |             |             | H | -3.97753900 | 3.59149900  | 0.85105100  |
| C | 5.08862100  | -2.39037300 | -0.22783800 | P   | 1.42141500  | 0.72103800  | -0.44766000 | C | 1.32450400  | -4.28418600 | 1.47387000  |
| H | 5.93746100  | -3.05220000 | -0.04362400 | O   | 1.02882300  | -1.47692300 | -3.42387300 | C | 3.28044400  | -1.36018200 | -0.87905100 |
| C | -2.99619100 | 2.54730800  | 1.91803000  | O   | 0.71353000  | -3.86109200 | -0.79355600 | H | 2.41315900  | -2.02343100 | -0.92553400 |
| H | -3.41254600 | 3.50147100  | 1.58627900  | N   | -1.24992900 | -0.15608700 | 1.03174600  | C | 0.41806500  | -2.73874600 | 3.09524300  |
| C | 1.23520500  | -3.71755700 | 1.41890300  | N   | -1.31002300 | -0.16833000 | 3.25184500  | H | 0.16474700  | -2.48066900 | 4.12514600  |
| H | 1.32166200  | -4.79079700 | 1.23335300  | H   | -1.07689700 | -0.42382100 | 4.20181800  | C | 1.52286400  | 1.88891200  | 4.04708300  |
| C | 5.11971300  | -1.09218100 | 0.27626200  | N   | 0.32538900  | -2.23440000 | 0.74110300  | H | 1.53132400  | 2.14724000  | 5.10914100  |
| H | 5.97158100  | -0.72436900 | 0.85131600  | C   | 2.08280100  | 3.46533500  | -0.87742400 | C | 0.03260500  | -1.93982000 | 2.02593000  |
| C | 4.01151700  | -0.29167000 | 0.00865900  | H   | 2.50616500  | 3.46998500  | 0.13073500  | C | 4.24104600  | 0.84613900  | -0.67736500 |
| C | -3.03430100 | 2.18571300  | 3.26353600  | C   | 1.47897500  | 2.30397900  | -1.38381400 | H | 4.12990300  | 1.92649300  | -0.55314500 |
| H | -3.48864800 | 2.85311100  | 3.99986100  | C   | -0.80997000 | -0.76044300 | 2.12886900  | C | 0.79123000  | -3.48702800 | 0.39640200  |
| C | -2.48316700 | 0.97024700  | 3.67052700  | C   | 3.10804600  | 0.02003100  | -0.71333500 | C | -2.05221400 | 0.88030300  | 1.44233400  |
| H | -2.50694500 | 0.68157700  | 4.72415500  | C   | 2.14449300  | 4.62621700  | -1.64636200 | C | -3.49499400 | 2.80972000  | 2.80650000  |
| C | -4.45302300 | -3.63500400 | -0.93005900 | H   | 2.61235800  | 5.52356100  | -1.23443100 | H | -4.07233800 | 3.58156600  | 3.31999400  |
| H | -5.23770800 | -4.35839200 | -1.16375600 | C   | -2.72165500 | 1.85473500  | 0.69698600  | C | 4.56115700  | -1.90031900 | -1.00119100 |
| C | 1.39946000  | 4.81424600  | 0.55478800  | H   | -2.66746600 | 1.83971900  | -0.39458000 | H | 4.67557600  | -2.97858400 | -1.13348700 |
| H | 1.74626200  | 5.72586900  | 1.04921100  | C   | 2.27802600  | 0.48970400  | 2.22456600  | C | 0.76580400  | 2.64237800  | 3.14889600  |
| C | -2.62685700 | -2.22128600 | -1.64464200 | H   | 2.86538900  | -0.36388300 | 1.87235100  | H | 0.16619200  | 3.48475000  | 3.50316900  |

|    |             |             |             |     |             |             |             |   |             |             |             |
|----|-------------|-------------|-------------|-----|-------------|-------------|-------------|---|-------------|-------------|-------------|
| C  | -2.83062600 | 1.84620700  | 3.56186500  | H   | -6.35024600 | 1.29466600  | -1.32070600 | C | 2.25405700  | 0.38242000  | 2.29263600  |
| H  | -2.86801600 | 1.85251400  | 4.65302100  | H   | -5.49817000 | -0.10132700 | 0.55939900  | H | 2.84122300  | -0.46565100 | 1.92643400  |
| C  | -2.10785500 | 0.88661100  | 2.85552000  | C   | -2.57499100 | -2.45918400 | -2.21431500 | C | 0.66051000  | -1.18228600 | -2.44945300 |
| C  | 5.68047800  | -1.07254400 | -0.96142700 | H   | -2.04488000 | -2.26179800 | -3.16330300 | C | 1.53405100  | 1.17570500  | 1.38581500  |
| H  | 6.68230200  | -1.49736200 | -1.06059900 | O   | -1.67769200 | -2.48005800 | -1.11762500 | C | 2.23055400  | 0.66161000  | 3.65857400  |
| C  | 5.51733400  | 0.30425700  | -0.80132800 | H   | -0.96258000 | -3.15984100 | -1.22235600 | H | 2.80445100  | 0.03559700  | 4.34693900  |
| H  | 6.38965100  | 0.96161500  | -0.77511700 | H   | -3.04541700 | -3.45601900 | -2.30871300 | C | 0.78002600  | 2.24846200  | 1.88680900  |
| C  | 1.61216400  | 4.64179800  | -2.93483700 | H   | 1.81803200  | -5.22161300 | 1.21117500  | H | 0.19673200  | 2.87137300  | 1.20180500  |
| H  | 1.66100100  | 5.55205600  | -3.53710200 |     |             |             |             | C | -3.35618300 | 2.87114600  | 1.26352900  |
| C  | 1.12682100  | -3.91572000 | 2.78574300  | IM3 |             |             |             | H | -3.86573100 | 3.65771800  | 0.70304400  |
| H  | 1.48728500  | -4.55906600 | 3.59320500  | P   | 1.44788800  | 0.69949600  | -0.39359200 | C | 0.96483700  | -4.47324600 | 1.37728100  |
| C  | 0.94095000  | 2.33395500  | -2.67748000 | O   | 1.21400300  | -1.41914500 | -3.44849900 | C | 3.32071900  | -1.37774700 | -0.74738700 |
| H  | 0.45314300  | 1.44148000  | -3.07687900 | O   | 0.39904300  | -3.96947100 | -0.88261600 | H | 2.44515600  | -2.03151700 | -0.76037400 |
| C  | 1.01395600  | 3.49223600  | -3.44869500 | N   | -1.27304100 | -0.17553500 | 0.94169800  | C | 0.27600500  | -2.83639600 | 3.01740700  |
| H  | 0.59284600  | 3.49666400  | -4.45658500 | N   | -1.35134900 | -0.16504500 | 3.16583700  | H | 0.09203400  | -2.55176800 | 4.05483300  |
| Ru | -0.25445900 | -0.74056900 | -0.82823200 | H   | -1.12619600 | -0.40750300 | 4.12113900  | C | 1.49398000  | 1.74388900  | 4.14180800  |
| H  | -1.03315500 | 0.36552000  | -1.70466100 | N   | 0.15631600  | -2.34245600 | 0.67639200  | H | 1.49154100  | 1.97494000  | 5.21015900  |
| C  | -4.13725000 | -1.21775500 | -0.68419900 | C   | 2.15420200  | 3.45613500  | -0.71243800 | C | -0.08985100 | -2.00784900 | 1.96009900  |
| C  | -3.61890000 | -1.41102000 | -1.97070500 | H   | 2.56101200  | 3.42146800  | 0.30199400  | C | 4.28383700  | 0.82951200  | -0.64233200 |
| C  | -4.09222600 | -0.61318800 | -3.01643300 | C   | 1.55086000  | 2.31747700  | -1.26931300 | H | 4.17695000  | 1.91430200  | -0.56396500 |
| C  | -5.07377000 | 0.35032700  | -2.78708100 | C   | -0.86436300 | -0.78112600 | 2.04819700  | C | 0.51050400  | -3.59650300 | 0.36780200  |
| C  | -5.58701500 | 0.53425900  | -1.50380500 | C   | 3.14796700  | 0.00792700  | -0.63388600 | C | -2.03810300 | 0.89150500  | 1.33864500  |
| C  | -5.11306700 | -0.25156600 | -0.45278500 | C   | 2.24015700  | 4.64259800  | -1.43876400 | C | -3.42269100 | 2.88163900  | 2.67110600  |
| H  | -3.75330400 | -1.82304400 | 0.14073700  | H   | 2.70790500  | 5.52075200  | -0.98708800 | H | -3.97809600 | 3.67825600  | 3.17087900  |
| H  | -3.67690200 | -0.74072100 | -4.02037800 | C   | -2.66800100 | 1.88050100  | 0.57628200  | C | 4.59695200  | -1.92884600 | -0.85953000 |
| H  | -5.43113800 | 0.96828900  | -3.61431300 | H   | -2.61243400 | 1.84827800  | -0.51453000 | H | 4.71009800  | -3.01139500 | -0.95262600 |

|    |             |             |             |     |             |             |             |   |             |             |             |
|----|-------------|-------------|-------------|-----|-------------|-------------|-------------|---|-------------|-------------|-------------|
| C  | 0.77096800  | 2.53729900  | 3.25048800  | H   | -3.76530200 | -0.36930800 | -3.98158100 | C | 3.16465700  | -1.59564200 | -1.32080800 |
| H  | 0.18664400  | 3.38549100  | 3.61630500  | H   | -5.55276100 | 1.24159600  | -3.35913100 | H | 2.39227700  | -2.03570500 | -1.95485900 |
| C  | -2.80110300 | 1.90448800  | 3.44303100  | H   | -6.38457700 | 1.33876400  | -1.01082200 | C | 1.19007900  | -0.81806600 | 1.97114100  |
| H  | -2.84852400 | 1.92322400  | 4.53361100  | H   | -5.40633200 | -0.18073800 | 0.70557900  | H | 0.95357600  | 0.22994200  | 2.18444200  |
| C  | -2.10559300 | 0.91341200  | 2.75152600  | C   | -2.51283500 | -2.20159300 | -2.36294600 | C | -1.68423700 | 0.43380500  | -2.64245900 |
| C  | 5.71849100  | -1.10248700 | -0.86442500 | H   | -2.06050300 | -1.89579900 | -3.33340600 | C | 0.35815200  | -1.55932300 | 1.11640300  |
| H  | 6.71820800  | -1.53308500 | -0.95880000 | O   | -1.58378100 | -2.37188300 | -1.35499400 | C | 2.31751800  | -1.39870700 | 2.54600700  |
| C  | 5.55809000  | 0.27920400  | -0.75779100 | H   | -0.36224800 | -3.39390300 | -1.28432000 | H | 2.95803600  | -0.80420900 | 3.20350300  |
| H  | 6.43176100  | 0.93522800  | -0.76845500 | H   | -3.00878800 | -3.17626000 | -2.57171400 | C | 0.68416500  | -2.89781500 | 0.86003500  |
| C  | 1.73309700  | 4.70788500  | -2.73601800 | H   | 1.32738100  | -5.46311500 | 1.09907900  | H | 0.05267600  | -3.49166300 | 0.19255100  |
| H  | 1.80041600  | 5.63820000  | -3.30495000 |     |             |             |             | C | 4.36823200  | -2.23263500 | -1.04925700 |
| C  | 0.86426000  | -4.06757100 | 2.69860300  | IM4 |             |             |             | H | 4.56664700  | -3.21429700 | -1.48443300 |
| H  | 1.18839400  | -4.73821400 | 3.49740100  | P   | -0.96716700 | -0.71496700 | 0.17133600  | C | -0.67418200 | 4.61793700  | 0.02915200  |
| C  | 1.04048500  | 2.39773100  | -2.57220600 | O   | -2.68874700 | 0.36532700  | -3.24071000 | H | -1.45658400 | 5.37362300  | -0.03825000 |
| H  | 0.55601900  | 1.52336900  | -3.01352100 | O   | -1.83444400 | 3.31970400  | -1.54996500 | C | -2.62843900 | 1.33727600  | 1.01627800  |
| C  | 1.13740400  | 3.58160000  | -3.30125200 | N   | 1.87607100  | 0.50645000  | -0.82079500 | H | -2.69203600 | 1.54065800  | -0.05654100 |
| H  | 0.73670000  | 3.62389400  | -4.31657200 | N   | 3.40140200  | 1.43973200  | 0.50862900  | C | 1.41985900  | 3.77707400  | 0.84855400  |
| Ru | -0.23636700 | -0.76765000 | -0.92414000 | H   | 3.85579600  | 2.13198200  | 1.08755600  | H | 2.31946900  | 3.88335300  | 1.45716300  |
| H  | -0.92847200 | 0.36258200  | -1.81825300 | N   | 0.10769500  | 2.46052500  | -0.70143600 | C | 2.63666000  | -2.73026400 | 2.27723000  |
| C  | -4.05870100 | -1.13335400 | -0.68477300 | C   | -2.96080700 | -2.60705900 | 0.87126600  | H | 3.52747400  | -3.18189200 | 2.72007000  |
| C  | -3.58823900 | -1.20460700 | -2.00215200 | H   | -2.91218800 | -2.18368800 | 1.87844400  | C | 1.22475200  | 2.64505200  | 0.05724000  |
| C  | -4.13761100 | -0.33772200 | -2.95245800 | C   | -2.15819100 | -2.08049700 | -0.15139600 | C | -1.77115200 | 0.01760600  | 2.84238700  |
| C  | -5.13904200 | 0.56908000  | -2.60281300 | C   | 2.16353100  | 1.55734100  | -0.06617800 | H | -1.17256800 | -0.81728400 | 3.21772800  |
| C  | -5.60454800 | 0.62525900  | -1.28933400 | C   | -1.84082200 | 0.26786100  | 1.46380100  | C | -0.79319400 | 3.45372700  | -0.74268800 |
| C  | -5.05843300 | -0.23067000 | -0.33090100 | C   | -3.82803800 | -3.66601100 | 0.61508400  | C | 2.95501300  | -0.34096000 | -0.74117500 |
| H  | -3.60873100 | -1.79431000 | 0.06153700  | H   | -4.44993400 | -4.06428400 | 1.42039500  | C | 5.34434300  | -1.64215700 | -0.22394400 |

|     |             |             |             |   |             |             |             |   |             |             |             |
|-----|-------------|-------------|-------------|---|-------------|-------------|-------------|---|-------------|-------------|-------------|
| H   | 6.27896600  | -2.17624200 | -0.03936400 | P | 1.93137400  | 0.31005600  | 0.02604700  | C | -0.55891000 | -4.12803900 | 1.13575000  |
| C   | -3.32553300 | 2.13990800  | 1.91645400  | O | 2.02809100  | -2.19206600 | -2.95499600 | C | 2.90178600  | -2.15727400 | 0.85624100  |
| H   | -3.93275000 | 2.96850700  | 1.54331400  | O | 0.76103900  | -3.66666200 | -0.76514500 | H | 2.52225700  | -2.52098600 | -0.10209700 |
| C   | 1.81228700  | -3.47804800 | 1.43886900  | N | -1.27114200 | 0.58937500  | -0.10506900 | C | -1.88681000 | -2.34198300 | 2.03923200  |
| H   | 2.05251300  | -4.52234100 | 1.22465500  | N | -2.73852300 | 0.53194100  | 1.55783700  | H | -2.63755900 | -1.96882200 | 2.73720800  |
| C   | 5.15114100  | -0.39546200 | 0.36299100  | H | -3.38122500 | 0.12161000  | 2.22298800  | C | 0.09046300  | 3.81635300  | 2.41973100  |
| H   | 5.90976700  | 0.05632900  | 1.00497400  | N | -0.42444900 | -1.93035100 | 0.15535700  | H | -0.40576800 | 4.63237600  | 2.95000600  |
| C   | 3.94006100  | 0.24017200  | 0.09311200  | C | 4.41645900  | 1.61961400  | -0.10077300 | C | -1.35989000 | -1.52274800 | 1.05464200  |
| C   | -3.23918800 | 1.88924800  | 3.28555400  | H | 4.33888000  | 1.67647300  | 0.98911900  | C | 3.19302000  | -0.39208300 | 2.48342800  |
| H   | -3.77743100 | 2.52163200  | 3.99560800  | C | 3.39109100  | 1.01383000  | -0.84383000 | H | 3.06190300  | 0.64684100  | 2.79839800  |
| C   | -2.46312100 | 0.82505100  | 3.74467800  | C | -1.79568100 | -0.15752800 | 0.85693000  | C | -0.01992900 | -3.26734900 | 0.10076800  |
| H   | -2.39751900 | 0.61789200  | 4.81576700  | C | 2.71628700  | -0.82230400 | 1.23524200  | C | -1.89524000 | 1.81242200  | -0.04998700 |
| C   | -3.90531400 | -4.21355700 | -0.66620700 | C | 5.53187900  | 2.15353500  | -0.73769300 | C | -3.49661000 | 4.01071900  | 0.48976400  |
| H   | -4.58951000 | -5.04141600 | -0.86739700 | H | 6.32027800  | 2.62484500  | -0.14646100 | H | -4.11872800 | 4.88823800  | 0.67766300  |
| C   | 0.44047900  | 4.76917700  | 0.84161700  | C | -1.74592100 | 2.95458500  | -0.84121600 | C | 3.53913800  | -3.05008600 | 1.71599800  |
| H   | 0.55516100  | 5.66389600  | 1.45585300  | H | -1.01583900 | 2.97735300  | -1.65336100 | H | 3.65992200  | -4.09137300 | 1.40876700  |
| C   | -2.24421500 | -2.63429600 | -1.43456400 | C | 0.59478200  | 1.46235100  | 2.20277900  | C | 0.83855400  | 4.07793900  | 1.27463700  |
| H   | -1.62251900 | -2.22526200 | -2.23523400 | H | 0.48613900  | 0.43513100  | 2.56629900  | H | 0.93360900  | 5.10137100  | 0.90427300  |
| C   | -3.11206900 | -3.69652400 | -1.68825700 | C | 1.28784800  | -1.62682100 | -2.27118800 | C | -3.65763000 | 2.88125400  | 1.28703900  |
| H   | -3.17150500 | -4.11599500 | -2.69518200 | C | 1.34311500  | 1.71515100  | 1.04184400  | H | -4.39678000 | 2.84991800  | 2.08973100  |
| Ru  | -0.10328500 | 0.47355800  | -1.73640700 | C | -0.02759200 | 2.50470800  | 2.88332400  | C | -2.84342200 | 1.78844600  | 0.99912300  |
| H   | 0.15840000  | -0.94647000 | -2.44634100 | H | -0.61476200 | 2.29079100  | 3.78010600  | C | 4.00437900  | -2.61927500 | 2.95694500  |
| H   | -1.71135000 | 2.47418000  | -2.03659200 | C | 1.45706200  | 3.03420800  | 0.58580800  | H | 4.49982800  | -3.32102500 | 3.63209400  |
| H   | 0.59195900  | 1.01423900  | -3.12082900 | H | 2.02958300  | 3.25058000  | -0.32147700 | C | 3.83280700  | -1.28804900 | 3.33736800  |
|     |             |             |             | C | -2.55668500 | 4.04709500  | -0.55670200 | H | 4.19689300  | -0.94293800 | 4.30799500  |
| IM5 |             |             |             | H | -2.46681000 | 4.95376400  | -1.15852700 | C | 5.64487300  | 2.08230500  | -2.12772400 |



|    |             |             |             |     |             |             |             |   |             |             |             |
|----|-------------|-------------|-------------|-----|-------------|-------------|-------------|---|-------------|-------------|-------------|
| H  | 6.52328200  | 2.49701400  | -2.62742800 | IM6 |             |             |             | H | -4.56647700 | 1.56139700  | 2.14058300  |
| C  | -1.45498900 | -3.68158700 | 2.07058900  | P   | 1.38658700  | 0.82430700  | 0.28450300  | C | 2.36034000  | -4.10023900 | -1.26226900 |
| H  | -1.84509400 | -4.36380400 | 2.83064700  | O   | 2.01271500  | 0.65936500  | -3.41206000 | C | 3.84413700  | -0.35664000 | -0.30083100 |
| C  | 3.51491200  | 0.94623600  | -2.23547500 | O   | 2.56211400  | -2.09266600 | -2.48369000 | H | 3.44744700  | -0.46290600 | -1.31312800 |
| H  | 2.73669700  | 0.46807700  | -2.83389900 | N   | -1.22262900 | -1.05393800 | 0.25414000  | C | 0.53765100  | -4.29339900 | 0.28796300  |
| C  | 4.63741000  | 1.47686000  | -2.87360600 | N   | -1.77232300 | -2.77805300 | 1.53849300  | H | -0.06039100 | -4.87430600 | 0.99170100  |
| H  | 4.72189500  | 1.41011400  | -3.96037300 | H   | -1.75162600 | -3.70871500 | 1.93218000  | C | -0.95157600 | 0.85160600  | 4.28495200  |
| Ru | 0.14651100  | -0.51669200 | -1.30577000 | N   | 0.90775500  | -2.20910900 | -0.89344400 | H | -1.54585400 | 0.82801700  | 5.20133400  |
| H  | 0.08276600  | 0.49096200  | -2.70437100 | C   | 2.62334700  | 3.33377000  | 0.68571300  | C | 0.20504900  | -2.98144500 | -0.01883100 |
| C  | -3.86287000 | -1.85637200 | -0.86168300 | H   | 3.16738000  | 2.84664000  | 1.49988000  | C | 3.58699700  | 0.27748000  | 2.01687000  |
| C  | -3.72372200 | -0.65017300 | -1.55933200 | C   | 1.71860100  | 2.59585600  | -0.09191700 | H | 2.99268300  | 0.70485500  | 2.82911500  |
| C  | -4.64274000 | 0.37613700  | -1.30727400 | C   | -0.92538400 | -2.30409000 | 0.57803800  | C | 1.98186400  | -2.74797700 | -1.61654400 |
| C  | -5.67014800 | 0.20837900  | -0.37862700 | C   | 3.05754200  | 0.19198200  | 0.71923700  | C | -2.28410600 | -0.67433500 | 1.04415400  |
| C  | -5.79442700 | -0.99560200 | 0.31727800  | C   | 2.83958200  | 4.68475300  | 0.42891300  | C | -4.39296700 | -0.47809900 | 2.83411900  |
| C  | -4.88676300 | -2.02834200 | 0.06864400  | H   | 3.54820200  | 5.24595000  | 1.04235800  | H | -5.23277400 | -0.37734900 | 3.52490400  |
| H  | -3.12820000 | -2.64548700 | -1.04812500 | C   | -2.95900500 | 0.54454300  | 1.14728700  | C | 5.13075400  | -0.81815200 | -0.02771900 |
| H  | -4.53691900 | 1.33160800  | -1.83422700 | H   | -2.66410200 | 1.39601000  | 0.53034600  | H | 5.72198800  | -1.25601300 | -0.83518600 |
| H  | -6.37126100 | 1.02666900  | -0.18980700 | C   | 0.48759300  | -0.26256600 | 2.69586000  | C | -0.88049100 | 2.01662900  | 3.52609100  |
| H  | -6.60193000 | -1.13233900 | 1.04186100  | H   | 1.02556800  | -1.16085500 | 2.37327200  | H | -1.41613200 | 2.91304800  | 3.84753800  |
| H  | -4.97653600 | -2.97748200 | 0.60541500  | C   | 1.32596800  | 0.20658700  | -2.59617300 | C | -3.72154600 | -1.69551200 | 2.75682800  |
| C  | -2.60051200 | -0.48283200 | -2.56573000 | C   | 0.55003700  | 0.90269500  | 1.91462800  | H | -4.01199200 | -2.54697300 | 3.37519200  |
| H  | -2.37499400 | 0.61082500  | -2.63333400 | C   | -0.26072100 | -0.28844700 | 3.86823300  | C | -2.66014800 | -1.76922100 | 1.85653800  |
| O  | -1.50572300 | -1.27639300 | -2.34521900 | H   | -0.30909300 | -1.20589200 | 4.46073500  | C | 5.64920000  | -0.73328800 | 1.26298600  |
| H  | 0.62987100  | 0.91120300  | -2.16286800 | C   | -0.13819400 | 2.04255300  | 2.34443200  | H | 6.65600500  | -1.10010700 | 1.47684800  |
| H  | -3.03107800 | -0.72135200 | -3.56778700 | H   | -0.10214700 | 2.95973700  | 1.74933800  | C | 4.87507100  | -0.18244400 | 2.28425800  |
| H  | -0.21811900 | -5.16442000 | 1.11717500  | C   | -4.01363400 | 0.62407700  | 2.04715500  | H | 5.27415300  | -0.11161200 | 3.29903500  |

|    |             |             |             |     |             |             |             |   |             |             |             |
|----|-------------|-------------|-------------|-----|-------------|-------------|-------------|---|-------------|-------------|-------------|
| C  | 2.15897600  | 5.31828800  | -0.61187400 | IM7 |             |             |             | H | 4.25118700  | -2.82652900 | 1.42271500  |
| H  | 2.33379600  | 6.37707200  | -0.81642800 | P   | -1.49272200 | -0.80710700 | 0.12370700  | C | -1.55542100 | 4.59868300  | -0.23174400 |
| C  | 1.66010700  | -4.84852200 | -0.35215200 | O   | -2.02044200 | 0.28280100  | -3.45309900 | C | -3.55037900 | 1.04999500  | 0.01067600  |
| H  | 1.96537100  | -5.87425300 | -0.12916100 | O   | -2.11444200 | 2.97691800  | -1.85789400 | H | -3.14357100 | 1.29892600  | -0.97339400 |
| C  | 1.04501900  | 3.24029000  | -1.13513500 | N   | 1.34966900  | 0.66418800  | 0.44815100  | C | 0.21813500  | 4.07362800  | 1.30464000  |
| H  | 0.34756800  | 2.67243200  | -1.75811000 | N   | 2.18672900  | 1.89619200  | 2.09134900  | H | 0.89902700  | 4.35785500  | 2.10887000  |
| C  | 1.26292800  | 4.59347600  | -1.39411400 | H   | 2.32189200  | 2.68802700  | 2.70487600  | C | 0.85937700  | -2.45124600 | 3.75543400  |
| H  | 0.73385700  | 5.07944000  | -2.21693000 | N   | -0.52505500 | 2.42065300  | -0.30253500 | H | 1.45724900  | -2.81702700 | 4.59340000  |
| Ru | 0.11811100  | -0.29938900 | -1.29474500 | C   | -3.30870200 | -2.94020000 | 0.01027200  | C | 0.28726800  | 2.82459800  | 0.70243000  |
| C  | -3.99100400 | -0.45295000 | -1.81637300 | H   | -3.66917900 | -2.56230800 | 0.97095900  | C | -3.45880700 | -0.17728200 | 2.09290000  |
| C  | -3.14918700 | 0.60524400  | -2.16431900 | C   | -2.26765600 | -2.27852600 | -0.65968400 | H | -2.99477700 | -0.92734700 | 2.73917800  |
| C  | -3.62995300 | 1.91714800  | -2.10076100 | C   | 1.26748600  | 1.82578900  | 1.08382500  | C | -1.44065100 | 3.30259300  | -0.87696500 |
| C  | -4.93136800 | 2.17043200  | -1.67381300 | C   | -2.93105500 | 0.09032200  | 0.81983600  | C | 2.34078800  | -0.06550900 | 1.06333500  |
| C  | -5.76687800 | 1.10914200  | -1.31837900 | C   | -3.89472700 | -4.07662800 | -0.53910100 | C | 4.40553100  | -1.04284900 | 2.63106700  |
| C  | -5.29581800 | -0.20121200 | -1.39643300 | H   | -4.70424500 | -4.57952400 | -0.00526900 | H | 5.22257900  | -1.44937500 | 3.23095000  |
| H  | -3.59125900 | -1.46816700 | -1.87718200 | C   | 2.81482300  | -1.35338800 | 0.80734400  | C | -4.66875700 | 1.74172200  | 0.47157600  |
| H  | -2.97253200 | 2.74794100  | -2.38108300 | H   | 2.38055300  | -1.94803200 | 0.00022800  | H | -5.12313700 | 2.50145900  | -0.16865500 |
| H  | -5.29924400 | 3.19818800  | -1.62178900 | C   | -0.34790500 | -0.66108200 | 2.67216200  | C | 0.55153300  | -3.29761200 | 2.69280500  |
| H  | -6.78869400 | 1.30622200  | -0.98501900 | H   | -0.69664300 | 0.37710100  | 2.66592400  | H | 0.90325100  | -4.33198500 | 2.69642100  |
| H  | -5.94962000 | -1.03315800 | -1.12203600 | C   | -1.27917100 | 0.38663900  | -2.56864400 | C | 3.93764400  | 0.24062000  | 2.90436200  |
| C  | -1.73434600 | 0.31413500  | -2.61161400 | C   | -0.65368900 | -1.50414900 | 1.59292000  | H | 4.36743900  | 0.84500000  | 3.70552100  |
| H  | -1.07646000 | 0.98316100  | -1.76732600 | C   | 0.40568300  | -1.13119400 | 3.74338400  | C | 2.89614500  | 0.70994600  | 2.10650900  |
| O  | -1.36334400 | -0.95206500 | -2.64406900 | H   | 0.64530100  | -0.46147500 | 4.57328300  | C | -5.18606800 | 1.47684700  | 1.73818700  |
| H  | -1.46677700 | 0.92913200  | -3.50705100 | C   | -0.19696700 | -2.82698400 | 1.61392900  | H | -6.05993500 | 2.02331700  | 2.10109500  |
| H  | 3.22734400  | -4.50267700 | -1.78846900 | H   | -0.42259600 | -3.49534200 | 0.77784600  | C | -4.58112000 | 0.51362400  | 2.54605400  |
|    |             |             |             | C   | 3.85152700  | -1.82593900 | 1.60279100  | H | -4.98208800 | 0.29914600  | 3.53959100  |

|    |             |             |             |     |             |             |             |   |             |             |             |
|----|-------------|-------------|-------------|-----|-------------|-------------|-------------|---|-------------|-------------|-------------|
| C  | -3.45478600 | -4.56578300 | -1.76975500 | IM8 |             |             |             | H | -5.67047200 | 0.14299400  | -2.62526300 |
| H  | -3.91999300 | -5.45353600 | -2.20444200 | P   | -0.53822300 | 2.10757700  | 0.06162100  | C | 1.80896300  | -2.49990700 | 2.63025600  |
| C  | -0.75179800 | 4.96998300  | 0.81437700  | O   | 2.61034900  | 0.90984000  | -1.62277300 | C | 1.50129900  | 2.07113300  | 1.95760800  |
| H  | -0.85315800 | 5.96235000  | 1.26261400  | O   | 2.59404300  | -0.83654700 | 1.11725000  | H | 1.99917000  | 1.40419400  | 1.24962400  |
| C  | -1.83330800 | -2.77697400 | -1.89272100 | N   | -1.96911400 | -0.80271200 | 0.00753800  | C | -0.55236200 | -2.88229200 | 2.70307000  |
| H  | -1.02469400 | -2.27222600 | -2.42473000 | N   | -3.18092700 | -2.09326400 | 1.34855200  | H | -1.41837000 | -3.44693800 | 3.05305000  |
| C  | -2.42561400 | -3.91343700 | -2.44375800 | H   | -3.39132200 | -2.79025300 | 2.04977900  | C | -5.10470700 | 2.53518000  | 0.71802300  |
| H  | -2.07997000 | -4.28573800 | -3.41063000 | N   | 0.35562700  | -1.17202100 | 1.25399500  | H | -6.18739400 | 2.58689300  | 0.85447800  |
| Ru | -0.05875000 | 0.44513200  | -1.19145500 | C   | -0.00169300 | 4.81532100  | -0.53180900 | C | -0.69088600 | -1.88826600 | 1.73997800  |
| C  | 3.89548900  | 0.84357900  | -1.53047400 | H   | -0.17363600 | 5.00371200  | 0.53136900  | C | -0.40293100 | 3.40912700  | 2.60552200  |
| C  | 3.01848900  | 0.05589500  | -2.28960500 | C   | -0.07737800 | 3.50853700  | -1.03633400 | H | -1.39901800 | 3.81214900  | 2.40138800  |
| C  | 3.42591500  | -1.22040500 | -2.70038800 | C   | -1.94177800 | -1.59587200 | 1.06897700  | C | 1.59088600  | -1.50261900 | 1.65672300  |
| C  | 4.67701300  | -1.71128000 | -2.33907200 | C   | 0.22497400  | 2.57246200  | 1.67025100  | C | -3.26664700 | -0.78974100 | -0.44568100 |
| C  | 5.54039500  | -0.92383700 | -1.57424400 | C   | 0.29739300  | 5.88220900  | -1.37502100 | C | -5.96737500 | -1.15838600 | -0.92687700 |
| C  | 5.14832500  | 0.35537500  | -1.17518200 | H   | 0.35565500  | 6.89425900  | -0.96772500 | H | -7.03013000 | -1.28911000 | -1.14163600 |
| H  | 3.56703100  | 1.84213000  | -1.22922900 | C   | -3.83439700 | -0.14811400 | -1.54877400 | C | 2.13590500  | 2.39725600  | 3.15438300  |
| H  | 2.74245800  | -1.83054800 | -3.29950900 | H   | -3.21361400 | 0.47256400  | -2.19878800 | H | 3.12923400  | 1.99229000  | 3.36182100  |
| H  | 4.98537200  | -2.71000200 | -2.65762300 | C   | -2.93709400 | 1.77058100  | 1.46077700  | C | -4.50581000 | 3.15700800  | -0.37537300 |
| H  | 6.52352500  | -1.30778600 | -1.29123700 | H   | -2.32279300 | 1.22089400  | 2.18248300  | H | -5.11734100 | 3.70318500  | -1.09761200 |
| H  | 5.82625900  | 0.97229600  | -0.57974800 | C   | 1.57571500  | 0.54666500  | -1.22738600 | C | -5.41392200 | -1.80932600 | 0.17184000  |
| C  | 1.70635900  | 0.59716300  | -2.70315300 | C   | -2.32559400 | 2.38408600  | 0.35610200  | H | -6.01581500 | -2.45170300 | 0.81725800  |
| H  | 0.40818600  | -1.08107600 | -1.50869900 | C   | -4.31513600 | 1.84410700  | 1.63913700  | C | -4.05300800 | -1.61054700 | 0.39418000  |
| O  | 1.30252200  | 1.73418200  | -2.32625600 | H   | -4.77828600 | 1.35508900  | 2.50005300  | C | 1.50360400  | 3.22570500  | 4.08079300  |
| H  | 1.26387400  | 0.12112300  | -3.60573800 | C   | -3.12492900 | 3.08051300  | -0.55857100 | H | 1.99868200  | 3.47625300  | 5.02206900  |
| H  | -2.30394100 | 5.27731100  | -0.64485700 | H   | -2.66577800 | 3.56435300  | -1.42563400 | C | 0.23394900  | 3.73172300  | 3.80308800  |
|    |             |             |             | C   | -5.19139600 | -0.34330700 | -1.77280400 | H | -0.26744300 | 4.38205100  | 4.52403400  |

|    |             |             |             |     |             |             |             |   |             |             |             |
|----|-------------|-------------|-------------|-----|-------------|-------------|-------------|---|-------------|-------------|-------------|
| C  | 0.52801600  | 5.65843600  | -2.73273800 | C   | 7.59601600  | -0.72788500 | 0.40231900  | C | 4.84991500  | -2.00496900 | -0.26471800 |
| H  | 0.76815100  | 6.49541800  | -3.39266200 | C   | 6.47120800  | -1.51751600 | 0.16721900  | H | 4.82230300  | -2.11067100 | 0.82370200  |
| C  | 0.73171000  | -3.18160000 | 3.16106200  | C   | 5.64028100  | -1.26314700 | -0.92967600 | C | 3.76197000  | -1.43324800 | -0.94149900 |
| H  | 0.88499700  | -3.96144800 | 3.90942500  | C   | 5.95467900  | -0.19715700 | -1.78036700 | C | -0.56918000 | 1.52004200  | 1.07599800  |
| C  | 0.15842000  | 3.29287400  | -2.39925800 | H   | 7.30929700  | 1.42036100  | -2.22051900 | C | 2.11337500  | -2.10253200 | 1.29768700  |
| H  | 0.10560800  | 2.27599400  | -2.79599800 | H   | 8.78859000  | 0.94460100  | -0.27151100 | C | 5.96861400  | -2.44461400 | -0.96669800 |
| C  | 0.45852400  | 4.36328900  | -3.24152500 | H   | 8.23542600  | -0.93752700 | 1.26381200  | H | 6.80808800  | -2.88869500 | -0.42647800 |
| H  | 0.64475400  | 4.17961500  | -4.30211200 | H   | 6.22082700  | -2.34258100 | 0.83795200  | C | 1.50030800  | 3.51927100  | -0.98181300 |
| Ru | -0.06614700 | -0.00499100 | -0.64508300 | H   | 5.29511300  | 0.02837700  | -2.62296500 | H | 1.93183300  | 2.93905100  | -1.80074800 |
| H  | 3.03874200  | -3.08966300 | -0.24695600 | C   | 4.44890900  | -2.13139000 | -1.20806100 | C | 2.41049400  | 1.06583900  | 2.09904000  |
| C  | -1.76579000 | -3.22043100 | -2.09513800 | O   | 3.94920300  | -2.70312000 | -0.02263000 | H | 1.61812800  | 0.46977400  | 2.56352200  |
| C  | -3.01685300 | -3.82762600 | -2.02242200 | H   | 3.67208600  | -1.53656500 | -1.72619500 | C | 0.55180900  | -1.74698200 | -2.14775100 |
| C  | -3.24724700 | -4.84591500 | -1.09297200 | H   | 4.73819900  | -2.93214400 | -1.91899300 | C | 3.00750400  | 0.62428100  | 0.90739800  |
| C  | -2.21653600 | -5.25040200 | -0.24382200 | H   | 3.30668200  | -1.49531200 | 0.83184000  | C | 2.80108000  | 2.26512200  | 2.68816000  |
| C  | -0.96398000 | -4.63875800 | -0.32064800 | H   | 0.37644900  | -1.76735600 | -1.25514400 | H | 2.31768100  | 2.59873800  | 3.61038800  |
| C  | -0.72772900 | -3.61768200 | -1.24495200 | H   | -0.65413700 | 0.42707900  | -2.07778200 | C | 4.01303900  | 1.40969100  | 0.33015500  |
| H  | -1.59292200 | -2.40004900 | -2.80198800 | H   | 2.83415300  | -2.71956500 | 2.93099500  | H | 4.48518400  | 1.08722900  | -0.60272200 |
| H  | -3.82389200 | -3.49582700 | -2.68179900 |     |             |             |             | C | 1.74720900  | 4.87544200  | -0.81106700 |
| H  | -4.22966300 | -5.32291000 | -1.03653500 | IM9 |             |             |             | H | 2.39654800  | 5.39699400  | -1.51730200 |
| H  | -2.38713500 | -6.05702200 | 0.47592000  | P   | 2.30594000  | -0.80881200 | -0.00211400 | C | -2.27342100 | -2.17672800 | 2.01471900  |
| H  | -0.13348400 | -4.93167900 | 0.32731800  | O   | 0.65507800  | -2.73219800 | -2.76191600 | C | 1.27876600  | -3.18743700 | 0.99683300  |
| C  | 0.64916400  | -2.97840800 | -1.30327100 | O   | -1.64404300 | -2.83463000 | -0.14953900 | H | 0.77004200  | -3.23167700 | 0.03102700  |
| O  | 1.49516700  | -3.36821200 | -0.40754400 | N   | 0.21596200  | 1.59988300  | 0.01458100  | C | -1.83763100 | 0.08427100  | 2.68335500  |
| H  | 1.00263900  | -2.94822800 | -2.36983800 | N   | -0.65689900 | 2.71917500  | 1.72342000  | H | -1.90880300 | 0.89776600  | 3.40760500  |
| C  | 7.08160100  | 0.58828800  | -1.54971300 | H   | -1.32377500 | 2.94111000  | 2.45091700  | C | 3.79960700  | 3.04329300  | 2.10010500  |
| C  | 7.90776200  | 0.32509300  | -0.45690200 | N   | -1.06312400 | -0.71703800 | 0.54001100  | H | 4.09944700  | 3.98914500  | 2.55734700  |

|   |             |             |             |    |             |             |             |      |             |             |             |
|---|-------------|-------------|-------------|----|-------------|-------------|-------------|------|-------------|-------------|-------------|
| C | -1.19399100 | 0.26937400  | 1.46281200  | Ru | 0.43122300  | -0.21043100 | -1.16846600 | H    | -4.06271200 | -3.92116000 | -1.14468300 |
| C | 2.75325000  | -2.07181800 | 2.54572400  | H  | 1.40979600  | 0.47203900  | -2.23469500 | H    | -5.23133600 | -4.51099400 | 0.96178400  |
| H | 3.42510500  | -1.24732000 | 2.79948400  | C  | -3.18881400 | 1.73437900  | -0.61293000 | H    | -6.53530900 | -2.78137100 | 2.19631800  |
| C | -1.65375300 | -1.89941500 | 0.77920800  | C  | -2.36808000 | 2.49250400  | -1.45520600 | H    | -6.68079700 | -0.46479300 | 1.28586500  |
| C | 0.66016200  | 2.89734900  | -0.05381900 | C  | -2.36520800 | 3.88479400  | -1.29917500 | C    | -3.97467700 | -1.51725400 | -2.40345900 |
| C | 1.17753300  | 5.59854200  | 0.25507500  | C  | -3.15544500 | 4.50045700  | -0.32917300 | H    | -4.21356800 | -0.47874900 | -2.69544900 |
| H | 1.39479100  | 6.66461900  | 0.35029700  | C  | -3.96692600 | 3.73173500  | 0.50853900  | H    | -4.34781900 | -2.16299300 | -3.22065500 |
| C | 1.07451500  | -4.20786400 | 1.92294500  | C  | -3.98059700 | 2.34334600  | 0.36089200  | O    | -2.57831200 | -1.67958900 | -2.29423100 |
| H | 0.41213000  | -5.03883900 | 1.66764100  | H  | -3.16770100 | 0.64565100  | -0.71720400 | H    | -2.12559300 | -0.77430700 | -2.38650500 |
| C | 4.40829100  | 2.60802400  | 0.92523100  | H  | -1.71291000 | 4.49311100  | -1.93578900 |      |             |             |             |
| H | 5.19105900  | 3.21065100  | 0.45832000  | H  | -3.12945800 | 5.58826100  | -0.21846600 | TS1a |             |             |             |
| C | 0.34468700  | 4.99185800  | 1.19017700  | H  | -4.58942100 | 4.21400000  | 1.26706000  | P    | 1.43768600  | 0.68270800  | -0.41348000 |
| H | -0.09989800 | 5.55779300  | 2.01096800  | H  | -4.60764900 | 1.72531700  | 1.01201700  | O    | 1.15374700  | -1.51070500 | -3.39167600 |
| C | 0.10007200  | 3.63079500  | 1.01714100  | C  | -1.50742300 | 1.81056800  | -2.50228000 | O    | 0.15442900  | -4.00586500 | -0.81965500 |
| C | 1.70060200  | -4.15900400 | 3.16787600  | H  | -0.57191900 | 2.40551000  | -2.61076900 | N    | -1.24203600 | -0.14526300 | 1.01115500  |
| H | 1.53509500  | -4.95392400 | 3.89905000  | O  | -1.26265600 | 0.48326000  | -2.27153200 | N    | -1.24302800 | -0.10244700 | 3.23548200  |
| C | 2.54392600  | -3.09140500 | 3.47407900  | H  | -1.86176300 | -2.42256200 | -1.04741800 | H    | -0.99455000 | -0.34122600 | 4.18596700  |
| H | 3.04686700  | -3.05079600 | 4.44346800  | H  | -2.02265600 | 1.94738900  | -3.48269100 | N    | 0.11005700  | -2.35427500 | 0.72577300  |
| C | 6.01441600  | -2.32303700 | -2.35641900 | H  | -2.70355200 | -3.16703100 | 2.16511000  | C    | 2.16655600  | 3.42530600  | -0.74690200 |
| H | 6.89018200  | -2.67327000 | -2.90801100 | C  | -5.44769700 | -0.90275800 | -0.43122500 | H    | 2.64983100  | 3.36200600  | 0.23202500  |
| C | -2.36400400 | -1.17812900 | 2.96673400  | C  | -4.70391300 | -1.86042400 | -1.12919500 | C    | 1.49942600  | 2.30893300  | -1.27604500 |
| H | -2.86059000 | -1.36856400 | 3.92030200  | C  | -4.63989700 | -3.16119300 | -0.61105700 | C    | -0.81251600 | -0.74845300 | 2.11215100  |
| C | 3.81672100  | -1.31531700 | -2.33484200 | C  | -5.29035800 | -3.49005400 | 0.57514700  | C    | 3.11712900  | -0.01574600 | -0.75103000 |
| H | 2.97414700  | -0.86975100 | -2.86889300 | C  | -6.02149000 | -2.52221900 | 1.26717900  | C    | 2.22415000  | 4.62216900  | -1.45836800 |
| C | 4.93789800  | -1.75902900 | -3.03700600 | C  | -6.10164000 | -1.22760700 | 0.75848100  | H    | 2.74272000  | 5.48277400  | -1.02895600 |
| H | 4.96466300  | -1.66526200 | -4.12504000 | H  | -5.52060400 | 0.11317000  | -0.83096300 | C    | -2.58841900 | 1.94596500  | 0.66278600  |

|   |             |             |             |    |             |             |             |                  |             |             |             |
|---|-------------|-------------|-------------|----|-------------|-------------|-------------|------------------|-------------|-------------|-------------|
| H | -2.56900300 | 1.89820300  | -0.42889200 | H  | 4.65727700  | -3.06174300 | -0.86986400 | H                | -3.66620900 | -1.68485200 | 0.09073500  |
| C | 2.34347700  | 0.33104200  | 2.23676700  | C  | 0.96183600  | 2.52005500  | 3.26520200  | H                | -3.71903600 | -0.46408700 | -4.02302100 |
| H | 2.89114900  | -0.53078700 | 1.84320300  | H  | 0.41646700  | 3.38172900  | 3.65868500  | H                | -5.44357200 | 1.24812900  | -3.50553200 |
| C | 0.60987100  | -1.24391600 | -2.39554200 | C  | -2.61970700 | 2.01456100  | 3.53150300  | H                | -6.29620500 | 1.49919600  | -1.17668600 |
| C | 1.60516000  | 1.14606400  | 1.36510600  | H  | -2.62739000 | 2.05078700  | 4.62267300  | H                | -5.40204300 | 0.02905200  | 0.62716600  |
| C | 2.38852900  | 0.60585600  | 3.60290200  | C  | -1.97969500 | 0.99250700  | 2.83189400  | C                | -2.56060600 | -2.25638700 | -2.29633500 |
| H | 2.97558900  | -0.03780800 | 4.26313500  | C  | 5.65013600  | -1.16307900 | -1.15375800 | H                | -2.07452500 | -2.01851200 | -3.26768500 |
| C | 0.90231800  | 2.23612000  | 1.90164000  | H  | 6.63457700  | -1.60823300 | -1.31608000 | O                | -1.65523200 | -2.39063500 | -1.25423100 |
| H | 0.30511600  | 2.87699700  | 1.24602100  | C  | 5.48954700  | 0.22077600  | -1.20827400 | H                | -0.66228500 | -3.34800300 | -1.18957700 |
| C | -3.22331000 | 2.96643600  | 1.35847400  | H  | 6.34774000  | 0.86458500  | -1.41505300 | H                | -3.07996300 | -3.22615700 | -2.45744900 |
| H | -3.72700500 | 3.76122400  | 0.80427500  | C  | 1.62513500  | 4.71960300  | -2.71403000 | H                | 1.11554600  | -5.53502400 | 1.13598700  |
| C | 0.81517100  | -4.52460300 | 1.41538000  | H  | 1.67004300  | 5.65818600  | -3.27151100 |                  |             |             |             |
| C | 3.28866900  | -1.40669900 | -0.70847900 | C  | 0.77897200  | -4.10709000 | 2.73456200  | TS1 <sub>b</sub> |             |             |             |
| H | 2.42203700  | -2.04931700 | -0.53197100 | H  | 1.09264600  | -4.79017200 | 3.52738100  | P                | 2.27800900  | -0.93139300 | 0.00852700  |
| C | 0.26408900  | -2.84441300 | 3.06627200  | C  | 0.90084100  | 2.41994700  | -2.53797800 | O                | 0.41218000  | -2.89825500 | -2.55946600 |
| H | 0.11776100  | -2.54959500 | 4.10685900  | H  | 0.37193100  | 1.56032400  | -2.95695000 | O                | -1.93965100 | -2.55273300 | -0.04643300 |
| C | 1.70311200  | 1.70533900  | 4.12124500  | C  | 0.96870900  | 3.61464300  | -3.25306900 | N                | 0.38700300  | 1.62842400  | -0.06729500 |
| H | 1.75461600  | 1.93262800  | 5.18915500  | H  | 0.49841300  | 3.68188400  | -4.23671500 | N                | -0.28720200 | 2.87134100  | 1.64621400  |
| C | -0.08487300 | -2.00403900 | 2.01375400  | Ru | -0.26447700 | -0.78000100 | -0.86969500 | H                | -0.87952300 | 3.16312800  | 2.41250100  |
| C | 4.23380500  | 0.79099500  | -1.00690900 | H  | -0.95984900 | 0.34362400  | -1.77032600 | N                | -1.05847600 | -0.53903700 | 0.60389000  |
| H | 4.12752400  | 1.87685700  | -1.06295300 | C  | -4.07957900 | -1.04643300 | -0.69492200 | C                | 4.69366700  | -2.37345200 | -0.23435200 |
| C | 0.36552900  | -3.63746000 | 0.40405200  | C  | -3.59947200 | -1.20384600 | -2.00125300 | H                | 4.69163800  | -2.40492500 | 0.85871900  |
| C | -1.96238000 | 0.94905400  | 1.41805900  | C  | -4.10104100 | -0.36549500 | -3.00191800 | C                | 3.64142700  | -1.74957400 | -0.92121100 |
| C | -3.23922000 | 2.99918100  | 2.76703400  | C  | -5.06680900 | 0.59864500  | -2.71093600 | C                | -0.32803200 | 1.64602400  | 1.04692800  |
| H | -3.75205000 | 3.81955100  | 3.27380600  | C  | -5.54334300 | 0.74116600  | -1.40804400 | C                | 1.99951400  | -2.09719100 | 1.40741800  |
| C | 4.54586500  | -1.97559700 | -0.90321800 | C  | -5.04441500 | -0.08631700 | -0.40034500 | C                | 5.74491800  | -2.96147200 | -0.93210800 |

|   |             |             |             |    |             |             |             |   |             |             |             |
|---|-------------|-------------|-------------|----|-------------|-------------|-------------|---|-------------|-------------|-------------|
| H | 6.55645400  | -3.44505100 | -0.38325000 | H  | 1.92992300  | 6.60736800  | -0.02442700 | C | -3.75695900 | 3.63785600  | 0.77241600  |
| C | 1.72943000  | 3.41395300  | -1.22556000 | C  | 0.73171700  | -3.98565000 | 2.25867200  | C | -3.87030100 | 2.26733600  | 0.53127500  |
| H | 2.06321500  | 2.77539100  | -2.04673200 | H  | -0.05813500 | -4.72684500 | 2.11297600  | H | -3.22714000 | 0.60180900  | -0.68559100 |
| C | 2.64932400  | 1.04692700  | 1.98494200  | C  | 4.65525800  | 2.37538100  | 0.58338600  | H | -1.56513100 | 4.42867200  | -1.71805500 |
| H | 1.85729400  | 0.53343600  | 2.53947400  | H  | 5.44033500  | 2.89383900  | 0.02778600  | H | -2.83178300 | 5.48606500  | 0.13369200  |
| C | 0.40541600  | -1.87008500 | -2.01364900 | C  | 0.82891500  | 5.04515800  | 0.95294400  | H | -4.31469800 | 4.10277900  | 1.58981000  |
| C | 3.12925200  | 0.49770200  | 0.78589300  | H  | 0.48297400  | 5.67122300  | 1.77767000  | H | -4.50993700 | 1.64384500  | 1.16378600  |
| C | 3.15988100  | 2.24833700  | 2.46953400  | C  | 0.48182000  | 3.69900400  | 0.85525300  | C | -1.57476400 | 1.79773400  | -2.48277900 |
| H | 2.76787600  | 2.66757900  | 3.40015600  | C  | 1.45599400  | -3.94815000 | 3.44924200  | H | -0.65898900 | 2.39191500  | -2.67945900 |
| C | 4.13961300  | 1.17596800  | 0.09268600  | H  | 1.24073000  | -4.66304500 | 4.24704600  | O | -1.25218300 | 0.46638200  | -2.30497700 |
| H | 4.51931500  | 0.76737400  | -0.84878100 | C  | 2.45980400  | -2.99440200 | 3.61715100  | H | -2.21166400 | -2.09585100 | -1.02301600 |
| C | 2.07922800  | 4.75499100  | -1.12921000 | H  | 3.03689100  | -2.96321300 | 4.54463500  | H | -2.18646700 | 1.91711400  | -3.40420600 |
| H | 2.71214600  | 5.20210400  | -1.89860000 | C  | 5.75821400  | -2.93787500 | -2.32744200 | H | -2.99806600 | -2.70718300 | 2.30254100  |
| C | -2.43076100 | -1.79260700 | 2.12580100  | H  | 6.58038900  | -3.40449300 | -2.87529400 | C | -5.69446400 | -0.66424800 | -0.65174100 |
| C | 0.99977200  | -3.06615300 | 1.24660800  | C  | -2.34598900 | -0.78661900 | 3.06690400  | C | -4.89920500 | -1.67404500 | -1.20449500 |
| H | 0.41311700  | -3.09830400 | 0.32460600  | H  | -2.83542800 | -0.89632300 | 4.03714700  | C | -4.91059200 | -2.93728300 | -0.59697100 |
| C | -1.65441900 | 0.38905400  | 2.75421800  | C  | 3.66384100  | -1.72989700 | -2.32044200 | C | -5.68563200 | -3.17902300 | 0.53401600  |
| H | -1.59683100 | 1.21555600  | 3.46488700  | H  | 2.84945600  | -1.24424400 | -2.86299200 | C | -6.46765700 | -2.15949600 | 1.08062000  |
| C | 4.16272400  | 2.91891300  | 1.76787700  | C  | 4.71717800  | -2.32194000 | -3.01800800 | C | -6.47320800 | -0.90119300 | 0.48207300  |
| H | 4.55679900  | 3.86591100  | 2.14407900  | H  | 4.71811500  | -2.30349800 | -4.11023100 | H | -5.70339800 | 0.32572500  | -1.11855700 |
| C | -1.04025200 | 0.46933700  | 1.50926300  | Ru | 0.43614300  | -0.26288100 | -1.14332000 | H | -4.29242900 | -3.73624700 | -1.01494700 |
| C | 2.73311400  | -2.07705700 | 2.60350200  | H  | 1.44302000  | 0.26995900  | -2.27076800 | H | -5.68347800 | -4.17170300 | 0.99188400  |
| H | 3.52617600  | -1.33843700 | 2.75009200  | C  | -3.16270400 | 1.67969300  | -0.51654100 | H | -7.07820400 | -2.35001000 | 1.96679600  |
| C | -1.80314800 | -1.63785400 | 0.86302400  | C  | -2.33066000 | 2.44368300  | -1.34238400 | H | -7.08906200 | -0.09828100 | 0.89608400  |
| C | 0.91487300  | 2.88754900  | -0.21893300 | C  | -2.22646200 | 3.81830800  | -1.09301000 | C | -4.02309300 | -1.41800700 | -2.40597500 |
| C | 1.63499600  | 5.55643600  | -0.05985300 | C  | -2.93283400 | 4.41202200  | -0.04714100 | H | -4.28255400 | -0.43256500 | -2.83885800 |

|     |             |             |             |   |             |             |             |    |             |             |             |
|-----|-------------|-------------|-------------|---|-------------|-------------|-------------|----|-------------|-------------|-------------|
| H   | -4.25463300 | -2.16616100 | -3.18957300 | H | 1.50278800  | -2.54780100 | 4.11029800  | C  | 5.77947700  | -2.25263500 | -0.70099500 |
| O   | -2.65295600 | -1.45656500 | -2.10504200 | C | 0.78151000  | 0.87833900  | 2.44907300  | H  | 6.68686300  | -2.83986800 | -0.85968700 |
| H   | -2.06968400 | -0.45105400 | -2.26617000 | H | 0.56658800  | 1.84640900  | 1.98655200  | C  | 5.85384400  | -0.86693700 | -0.58182800 |
|     |             |             |             | C | -2.08843000 | 4.40977700  | -0.68939800 | H  | 6.81987400  | -0.36140700 | -0.64963900 |
| TS2 |             |             |             | H | -1.91435400 | 5.25683000  | -1.35628200 | C  | 3.30473300  | 4.61955600  | 0.04733200  |
| P   | 1.88148600  | 0.19459800  | -0.05230200 | C | -1.16183800 | -3.85316000 | 1.42467100  | H  | 3.63665700  | 5.66018900  | 0.07171700  |
| O   | 1.71905200  | -2.17559300 | -3.09825500 | C | 3.38044900  | -2.13440500 | -0.44709100 | C  | -1.91517600 | -3.21263500 | 2.40320500  |
| O   | 0.08733800  | -3.62148100 | -0.61693500 | H | 2.40695300  | -2.63302100 | -0.43615100 | H  | -2.31866400 | -3.78132000 | 3.24305900  |
| N   | -1.19932200 | 0.86950100  | -0.03085000 | C | -2.14555000 | -1.84595300 | 2.29919800  | C  | 2.15385300  | 2.81288500  | -1.07177000 |
| N   | -2.68361100 | 1.06845900  | 1.62030000  | H | -2.71940200 | -1.31397000 | 3.05943700  | H  | 1.58513400  | 2.43606200  | -1.92580600 |
| H   | -3.42602000 | 0.75777000  | 2.23331100  | C | 0.60367400  | -0.59812200 | 4.35451500  | C  | 2.58455800  | 4.13962100  | -1.04387000 |
| N   | -0.86593000 | -1.77901600 | 0.25239800  | H | 0.26722800  | -0.79091500 | 5.37609500  | H  | 2.34950000  | 4.80088500  | -1.88106900 |
| C   | 3.17059800  | 2.44247600  | 1.08519600  | C | -1.61647900 | -1.16601300 | 1.19957000  | Ru | 0.12948900  | -0.34279900 | -1.36466400 |
| H   | 3.41044200  | 1.78161600  | 1.92357500  | C | 4.69697800  | -0.11362300 | -0.38314200 | H  | 0.64106900  | 0.78357400  | -2.33658300 |
| C   | 2.43689500  | 1.95098300  | -0.00766500 | H | 4.77662900  | 0.97229100  | -0.30185800 | C  | -4.15698300 | 0.26013200  | -1.26172900 |
| C   | -1.83646700 | 0.23718900  | 0.94087200  | C | -0.65279300 | -3.08459500 | 0.36780800  | C  | -3.34827200 | -0.75817900 | -1.77349700 |
| C   | 3.44572300  | -0.73940400 | -0.30404600 | C | -1.68306200 | 2.15595000  | -0.04385400 | C  | -3.60982200 | -2.08020400 | -1.39317600 |
| C   | 3.60035100  | 3.76624900  | 1.11189500  | C | -3.02280300 | 4.54793700  | 0.35625200  | C  | -4.63580000 | -2.37815800 | -0.49889100 |
| H   | 4.16813300  | 4.13464500  | 1.96962300  | H | -3.54078700 | 5.50063100  | 0.48607000  | C  | -5.43180600 | -1.35108000 | 0.01909900  |
| C   | -1.41496100 | 3.21747100  | -0.91332600 | C | 4.53806100  | -2.88438700 | -0.63404600 | C  | -5.19417000 | -0.03295000 | -0.37533600 |
| H   | -0.74487500 | 3.06630900  | -1.75911500 | H | 4.46755500  | -3.96863800 | -0.74699700 | H  | -3.92274100 | 1.28317700  | -1.57512100 |
| C   | 1.72910900  | -1.33479100 | 2.34434300  | C | 0.35021000  | 0.63332000  | 3.75126100  | H  | -2.97584400 | -2.88317000 | -1.79045200 |
| H   | 2.27443200  | -2.11600800 | 1.80858800  | H | -0.18957600 | 1.41328200  | 4.29458100  | H  | -4.81725000 | -3.41429400 | -0.19701800 |
| C   | 1.11765400  | -1.46141600 | -2.40163900 | C | -3.31769200 | 3.49406200  | 1.21523900  | H  | -6.24121200 | -1.58297700 | 0.71703900  |
| C   | 1.48022100  | -0.10175700 | 1.72686700  | H | -4.05889000 | 3.59497200  | 2.01047000  | H  | -5.82152200 | 0.77565200  | 0.01538900  |
| C   | 1.29510600  | -1.58036900 | 3.64624700  | C | -2.62947200 | 2.30085800  | 0.99651300  | C  | -2.20662100 | -0.37478000 | -2.71378400 |



|                  |             |             |             |   |             |             |             |                  |             |             |             |
|------------------|-------------|-------------|-------------|---|-------------|-------------|-------------|------------------|-------------|-------------|-------------|
| O                | -1.84515900 | 0.88916600  | -2.70457900 | C | 0.10278000  | -1.88493900 | 0.81002100  | C                | 4.88359500  | -1.30716200 | 0.33235700  |
| H                | -0.97480100 | -4.92853500 | 1.46476000  | C | 2.03315600  | -2.49071400 | 2.15379100  | H                | 5.66536100  | -1.09823700 | 1.06526000  |
| H                | 0.15703700  | -4.57480400 | -0.48673200 | H | 2.79546900  | -2.21250400 | 2.88647000  | C                | 3.79942800  | -0.45080600 | 0.14738500  |
| H                | -1.36371000 | -1.16248800 | -2.44791900 | C | 0.09555100  | -3.18133900 | 0.27713500  | C                | -2.31361800 | 1.94332700  | 3.80720300  |
| H                | -2.46370700 | -0.81773500 | -3.72563400 | H | -0.65945100 | -3.46026500 | -0.46353400 | H                | -2.61590900 | 2.55906100  | 4.65766600  |
|                  |             |             |             | C | 3.90686900  | -2.72829200 | -1.40055200 | C                | -1.90047600 | 0.62656000  | 4.00869800  |
| TS3 <sub>a</sub> |             |             |             | H | 3.97439400  | -3.64156100 | -1.99547900 | H                | -1.88355600 | 0.20498300  | 5.01670200  |
| P                | -1.02333200 | -0.60413300 | 0.13320100  | C | 0.40985300  | 4.85453600  | -0.13939700 | C                | -4.77286200 | -3.16741400 | -0.85669600 |
| O                | -3.03621600 | 1.20139500  | -2.38507900 | H | -0.03855200 | 5.81518100  | -0.39530800 | H                | -5.64677500 | -3.77829300 | -1.09506900 |
| O                | -0.60465600 | 3.72702500  | -1.99893800 | C | -1.94838300 | 1.68521200  | 1.43308600  | C                | 1.35255700  | 4.73262100  | 0.86501600  |
| N                | 1.85835000  | 0.30282700  | -0.77172500 | H | -1.96952600 | 2.10349700  | 0.42290500  | H                | 1.63807800  | 5.61147500  | 1.44814600  |
| N                | 3.42566900  | 0.73079200  | 0.75503700  | C | 2.01270700  | 3.51055300  | 1.08067000  | C                | -2.76433900 | -2.02073400 | -1.55809900 |
| H                | 3.94374000  | 1.23369600  | 1.46251200  | H | 2.85980000  | 3.44018400  | 1.76505500  | H                | -2.06554100 | -1.72770900 | -2.34636200 |
| N                | 0.52261600  | 2.49813800  | -0.49881900 | C | 2.01902700  | -3.77656200 | 1.61477400  | C                | -3.87352700 | -2.80954200 | -1.85916600 |
| C                | -3.44690500 | -1.94976000 | 0.75558200  | H | 2.76883400  | -4.50901600 | 1.92280800  | H                | -4.03910200 | -3.13689800 | -2.88813300 |
| H                | -3.29755600 | -1.61237600 | 1.78420000  | C | 1.57776800  | 2.41743800  | 0.33921400  | Ru               | -0.20044300 | 0.71961200  | -1.58998600 |
| C                | -2.53603100 | -1.58604000 | -0.24583000 | C | -1.50869900 | -0.15862100 | 2.92545500  | H                | -0.26351500 | -0.56864600 | -2.56243000 |
| C                | 2.26237600  | 1.14879200  | 0.17145500  | H | -1.19074300 | -1.19070200 | 3.09826800  | H                | -0.21175000 | 2.61491100  | -2.55854000 |
| C                | -1.51960000 | 0.36350200  | 1.62276000  | C | 0.06644900  | 3.70893600  | -0.91343300 | H                | 0.25794900  | 1.78846100  | -2.96110200 |
| C                | -4.55763500 | -2.73377800 | 0.45106400  | C | 2.78405400  | -0.71324200 | -0.80357800 |                  |             |             |             |
| H                | -5.26201900 | -3.00312000 | 1.24160800  | C | 4.91773900  | -2.44971500 | -0.46121200 | TS3 <sub>b</sub> |             |             |             |
| C                | 2.82976700  | -1.87119400 | -1.58564700 | H | 5.74995000  | -3.14829300 | -0.35108000 | P                | 1.53295700  | -1.05210200 | -0.31562300 |
| H                | 2.03320900  | -2.07412100 | -2.30444900 | C | -2.34221200 | 2.46850900  | 2.51607000  | O                | -1.80493200 | -2.54606300 | -1.22538000 |
| C                | 1.08425100  | -1.55225700 | 1.75488700  | H | -2.67040900 | 3.49677800  | 2.34709100  | O                | -2.46562100 | -1.17888200 | 1.93654600  |
| H                | 1.10993700  | -0.54454300 | 2.18175900  | C | 1.04431500  | -4.11944000 | 0.67904400  | N                | 0.47923100  | 1.95914800  | -0.07877600 |
| C                | -1.92388900 | 1.02704500  | -2.08707600 | H | 1.02328200  | -5.12541300 | 0.25318000  | N                | 1.29832800  | 3.34894500  | 1.45027100  |

|   |             |             |             |   |             |             |             |                  |             |             |             |
|---|-------------|-------------|-------------|---|-------------|-------------|-------------|------------------|-------------|-------------|-------------|
| H | 1.46527500  | 3.76587500  | 2.35572800  | H | 0.83740100  | 2.21684700  | 3.97815800  | H                | 0.48393200  | -1.70635400 | -2.98430600 |
| N | -0.83700600 | 0.39538700  | 1.64308500  | C | 4.92918400  | 2.09651800  | -0.47221700 | C                | 1.70916300  | -3.30908800 | -3.76658100 |
| C | 3.08594100  | -3.17004500 | -1.35013600 | H | 5.68378600  | 2.88462200  | -0.52748600 | H                | 1.16267400  | -3.36225400 | -4.71097600 |
| H | 3.62949000  | -3.12758500 | -0.40217000 | C | -0.04505800 | 1.34315800  | 2.20010400  | Ru               | -0.49368800 | 0.06783900  | -0.61025900 |
| C | 2.00740100  | -2.30322300 | -1.58059700 | C | 2.91522800  | -2.14591400 | 1.95366900  | H                | -0.14325300 | 0.19463200  | -2.17272400 |
| C | 0.57124500  | 2.21510300  | 1.21747300  | H | 3.83138100  | -1.68521300 | 1.57377500  | H                | -3.06569600 | -0.53788200 | 0.96916500  |
| C | 1.70680600  | -1.99379800 | 1.25624700  | C | -1.58349700 | -0.41532700 | 2.44964500  | H                | -1.89891700 | 1.01010200  | -1.05368500 |
| C | 3.47118000  | -4.09312400 | -2.31806800 | C | 1.18326000  | 2.94507000  | -0.72867700 | C                | -7.99637000 | -0.13183400 | -1.77630400 |
| H | 4.31202100  | -4.76317300 | -2.12407500 | C | 2.70313000  | 5.13021600  | -1.49578500 | C                | -8.40268800 | 0.94785500  | -0.99031700 |
| C | 1.42681300  | 3.13722100  | -2.09172500 | H | 3.29793900  | 5.98466500  | -1.82565400 | C                | -7.50087800 | 1.52467500  | -0.09862900 |
| H | 1.02480500  | 2.43109100  | -2.82120000 | C | 0.60547400  | -3.35160600 | 2.94251900  | C                | -6.20137000 | 1.02834300  | 0.01133700  |
| C | 3.34640600  | 0.79862900  | 0.81556900  | H | -0.30832500 | -3.81478700 | 3.32284600  | C                | -5.78794700 | -0.05146800 | -0.77191900 |
| H | 2.86545300  | 0.58067900  | 1.77450000  | C | 4.56584000  | 1.39106100  | -1.61771600 | C                | -6.69948200 | -0.62525100 | -1.66764000 |
| C | -1.29968300 | -1.52018600 | -0.98661500 | H | 5.03522200  | 1.62403900  | -2.57643500 | H                | -8.69514800 | -0.59093600 | -2.47995700 |
| C | 2.97210500  | 0.08402100  | -0.33281200 | C | 2.47034400  | 4.95310700  | -0.13521200 | H                | -9.41986700 | 1.33748400  | -1.07511300 |
| C | 4.31897100  | 1.79355800  | 0.74504600  | H | 2.87141000  | 5.64650300  | 0.60656900  | H                | -7.81039000 | 2.37075600  | 0.52022600  |
| H | 4.59650000  | 2.34375100  | 1.64849400  | C | 1.70676800  | 3.84528100  | 0.22936000  | H                | -5.48968200 | 1.47500400  | 0.70802100  |
| C | 3.59412300  | 0.39401800  | -1.54969900 | C | 1.80749100  | -3.48505900 | 3.63503700  | H                | -6.38477300 | -1.47064100 | -2.28763100 |
| H | 3.30554600  | -0.14332200 | -2.45815300 | H | 1.84668000  | -4.05924500 | 4.56380600  | C                | -4.39907500 | -0.61721000 | -0.67074600 |
| C | 2.19108900  | 4.23792500  | -2.45689700 | C | 2.96241900  | -2.88246100 | 3.13621000  | H                | -3.93468300 | -0.65285400 | -1.67514400 |
| H | 2.40150900  | 4.41945900  | -3.51293900 | H | 3.91027200  | -2.98795000 | 3.66969700  | H                | -4.43840700 | -1.66817700 | -0.33264900 |
| C | -1.35073200 | -0.38175000 | 3.85908700  | C | 2.78194300  | -4.16520400 | -3.52958500 | O                | -3.56482200 | 0.11933500  | 0.19966600  |
| H | -1.90673200 | -1.08884800 | 4.47640500  | H | 3.08122400  | -4.89336300 | -4.28722200 | H                | -2.60220500 | 0.58085200  | -0.41703200 |
| C | 0.55394900  | -2.60845800 | 1.76495600  | C | -0.48039600 | 0.53548200  | 4.40489300  |                  |             |             |             |
| H | -0.40150800 | -2.49796100 | 1.24491700  | H | -0.31566800 | 0.56374900  | 5.48464400  | TS4 <sub>a</sub> |             |             |             |
| C | 0.17172500  | 1.45445400  | 3.56910200  | C | 1.32247600  | -2.38176500 | -2.79827200 | P                | 1.85721400  | 0.21733100  | 0.03637600  |

|   |             |             |             |   |             |             |             |    |             |             |             |
|---|-------------|-------------|-------------|---|-------------|-------------|-------------|----|-------------|-------------|-------------|
| O | 1.87953200  | -2.22954600 | -2.87013900 | C | 2.57877400  | -2.30331000 | 0.94576300  | C  | -1.61119700 | -3.47723000 | 2.22050600  |
| O | 0.34242400  | -3.65983800 | -0.79998100 | H | 2.19294300  | -2.64931600 | -0.01705800 | H  | -1.97536800 | -4.11762800 | 3.02836800  |
| N | -1.29588300 | 0.73548400  | -0.05417100 | C | -1.95393200 | -2.11334500 | 2.19452700  | C  | 3.40037400  | 0.83593500  | -2.26176000 |
| N | -2.65356000 | 0.79965800  | 1.70244600  | H | -2.61432000 | -1.67757300 | 2.94580200  | H  | 2.51020100  | 0.58511300  | -2.84228100 |
| H | -3.25759500 | 0.44413600  | 2.43140300  | C | 0.43674000  | 4.01261500  | 2.27463200  | C  | 4.55690800  | 1.25586600  | -2.91990300 |
| N | -0.63136600 | -1.83074600 | 0.18264000  | H | 0.04354200  | 4.90420000  | 2.76848500  | H  | 4.56148800  | 1.32556600  | -4.00982600 |
| C | 4.53350900  | 1.05462300  | -0.14256400 | C | -1.45371400 | -1.34840100 | 1.15154900  | Ru | 0.07241300  | -0.43734400 | -1.27001300 |
| H | 4.53643500  | 0.97263700  | 0.94801800  | C | 3.00921000  | -0.53720400 | 2.53942900  | C  | -3.45010200 | -1.90738800 | -1.36635400 |
| C | 3.37583500  | 0.73129600  | -0.86707900 | H | 2.98217700  | 0.51771600  | 2.82564100  | C  | -3.58128100 | -0.55463300 | -1.70016100 |
| C | -1.80636500 | 0.03872000  | 0.95477300  | C | -0.33039000 | -3.19598500 | 0.12410500  | C  | -4.56209700 | 0.20926400  | -1.05563900 |
| C | 2.51870900  | -0.94699000 | 1.28987100  | C | -1.83694800 | 1.99779900  | 0.02064400  | C  | -5.39241000 | -0.36303500 | -0.09213400 |
| C | 5.68483600  | 1.47739800  | -0.79978700 | C | -3.26293300 | 4.30169500  | 0.61410900  | C  | -5.24890400 | -1.71106700 | 0.24133400  |
| H | 6.57815300  | 1.72535300  | -0.22205400 | H | -3.81799900 | 5.21893600  | 0.82130600  | C  | -4.27732400 | -2.48043200 | -0.40169500 |
| C | -1.65375300 | 3.12142700  | -0.78995100 | C | 3.10637300  | -3.23383600 | 1.83890500  | H  | -2.67046500 | -2.49560200 | -1.85880000 |
| H | -0.96361900 | 3.08618300  | -1.63574900 | H | 3.13192000  | -4.28888600 | 1.55657200  | H  | -4.66249200 | 1.27287800  | -1.30213200 |
| C | 0.67302900  | 1.60918000  | 2.17297300  | C | 1.18998800  | 4.13201100  | 1.10907200  | H  | -6.15203000 | 0.24838800  | 0.40441400  |
| H | 0.45949400  | 0.62058000  | 2.59227600  | H | 1.39348800  | 5.11890900  | 0.68693600  | H  | -5.89631400 | -2.16331700 | 0.99741300  |
| C | 1.15892800  | -1.60437300 | -2.21680100 | C | -3.45069500 | 3.19431400  | 1.43685900  | H  | -4.15475000 | -3.53522600 | -0.14132700 |
| C | 1.42374700  | 1.71929900  | 0.99193700  | H | -4.13957900 | 3.22332500  | 2.28320200  | C  | -2.67946300 | 0.06542900  | -2.73646300 |
| C | 0.18193600  | 2.74733200  | 2.80634600  | C | -2.72168300 | 2.04923200  | 1.12337200  | H  | -2.58346000 | 1.15138100  | -2.50651800 |
| H | -0.41017400 | 2.64557600  | 3.71957100  | C | 3.58367300  | -2.82179200 | 3.08184000  | O  | -1.45608300 | -0.56786900 | -2.89072700 |
| C | 1.67675500  | 2.99302800  | 0.46760400  | H | 3.99209100  | -3.55273600 | 3.78375200  | H  | -0.36199700 | 0.36592300  | -2.79936400 |
| H | 2.25447600  | 3.09709500  | -0.45583500 | C | 3.53778400  | -1.47143900 | 3.42832000  | H  | -3.20661100 | 0.03696200  | -3.71489200 |
| C | -2.37747700 | 4.26667300  | -0.47847700 | H | 3.91520500  | -1.14031000 | 4.39876800  | H  | 0.38024200  | 0.84051700  | -2.43298500 |
| H | -2.26015300 | 5.15990600  | -1.09544500 | C | 5.69928600  | 1.57810600  | -2.19191200 | H  | -0.56425000 | -5.05748200 | 1.19637300  |
| C | -0.83431800 | -4.00028400 | 1.21877700  | H | 6.60516600  | 1.90421800  | -2.70808900 |    |             |             |             |

|                  |             |             |             |   |             |             |             |    |             |             |             |
|------------------|-------------|-------------|-------------|---|-------------|-------------|-------------|----|-------------|-------------|-------------|
| TS4 <sub>b</sub> |             |             |             | H | 2.07903000  | -2.46446200 | 4.41445600  | C  | -4.28123900 | -4.71273900 | -1.17052900 |
| P                | -2.26917600 | -0.67414300 | -0.06916600 | C | -0.93659100 | 3.86143000  | -2.08231000 | H  | -4.76410600 | -5.65959400 | -1.42296500 |
| O                | -0.91113100 | -1.12777100 | -3.58529600 | C | -3.51469600 | 1.07896700  | -1.82866600 | C  | -0.78231600 | 4.56867900  | -0.91890100 |
| O                | -0.77944600 | 1.79609400  | -3.21631200 | H | -2.69164100 | 0.83139000  | -2.50422200 | H  | -0.96261600 | 5.64691100  | -0.89902900 |
| N                | 0.48495700  | 0.43176600  | 1.14894600  | C | -0.36835800 | 3.90292300  | 0.24985800  | C  | -2.36379100 | -3.24386800 | -1.28114300 |
| N                | 0.66157600  | 2.16555100  | 2.52444400  | H | -0.18075900 | 4.44537300  | 1.17765900  | H  | -1.34489400 | -3.06036200 | -1.62573300 |
| H                | 0.72840800  | 3.13372300  | 2.80866800  | C | -2.01618700 | -0.72557600 | 4.55274300  | C  | -2.98300000 | -4.45324300 | -1.60093800 |
| N                | -0.37750900 | 1.80274700  | -0.95903400 | H | -1.88897100 | -0.73094600 | 5.63773600  | H  | -2.44141100 | -5.19307100 | -2.19412400 |
| C                | -4.35321900 | -2.54815800 | -0.10401400 | C | -0.17103500 | 2.53372800  | 0.16877900  | Ru | -0.11449000 | -0.30555900 | -0.80271800 |
| H                | -4.90160500 | -1.80379700 | 0.48058900  | C | -4.62980100 | 0.88523400  | 0.30730000  | C  | 2.60580500  | 2.65409100  | -1.56164500 |
| C                | -3.04267600 | -2.27876500 | -0.52905000 | H | -4.69565500 | 0.46725800  | 1.31550200  | C  | 3.01098800  | 1.84682500  | -0.49138300 |
| C                | 0.31690600  | 1.74213600  | 1.27580500  | C | -0.69356900 | 2.43458000  | -2.16416800 | C  | 3.45287100  | 2.46046500  | 0.68618100  |
| C                | -3.56657100 | 0.53476800  | -0.53920300 | C | 0.96987200  | -0.02758500 | 2.35204600  | C  | 3.49099000  | 3.85103400  | 0.79684000  |
| C                | -4.96623100 | -3.75654600 | -0.41861100 | C | 1.94087400  | -0.37107900 | 4.92660700  | C  | 3.08588900  | 4.64645500  | -0.27480700 |
| H                | -5.98592000 | -3.95172600 | -0.07890600 | H | 2.33137600  | -0.53210700 | 5.93350500  | C  | 2.64404800  | 4.04196000  | -1.45343100 |
| C                | 1.31322400  | -1.31656600 | 2.76710800  | C | -4.49906100 | 1.96698400  | -2.25835000 | H  | 2.23971700  | 2.17348600  | -2.47294700 |
| H                | 1.19032400  | -2.16569800 | 2.09092700  | H | -4.43268000 | 2.39055900  | -3.26316300 | H  | 3.76466000  | 1.83454000  | 1.53039000  |
| C                | -2.33153900 | 0.49230300  | 2.48854900  | C | -2.00992300 | -1.92282000 | 3.84071800  | H  | 3.84317800  | 4.31543900  | 1.72270200  |
| H                | -2.44885400 | 1.44563900  | 1.96294900  | H | -1.88055800 | -2.87200500 | 4.36596100  | H  | 3.11342200  | 5.73609000  | -0.19270500 |
| C                | -0.61058900 | -0.74050200 | -2.53863200 | C | 1.59497100  | 0.91893600  | 4.53160100  | H  | 2.31706600  | 4.65880500  | -2.29448600 |
| C                | -2.31750100 | -0.70858600 | 1.76199700  | H | 1.70329200  | 1.76946400  | 5.20727500  | C  | 3.01114800  | 0.34979000  | -0.62277000 |
| C                | -2.18021800 | 0.48209000  | 3.87243300  | C | 1.10642600  | 1.06916300  | 3.23554700  | H  | 3.00441800  | -0.10702900 | 0.39207500  |
| H                | -2.18402100 | 1.42579200  | 4.42420300  | C | -5.54750400 | 2.31759500  | -1.40994600 | O  | 1.99219300  | -0.13845900 | -1.44325900 |
| C                | -2.15464600 | -1.91560700 | 2.45356100  | H | -6.31590400 | 3.01789800  | -1.74591900 | H  | 2.12293000  | -1.33703000 | -1.63750800 |
| H                | -2.13275800 | -2.86043800 | 1.90185700  | C | -5.61274600 | 1.77199200  | -0.12785800 | H  | 3.98558900  | 0.04539500  | -1.06029400 |
| C                | 1.79998500  | -1.46986000 | 4.06041300  | H | -6.43408700 | 2.03893200  | 0.54144400  | H  | 0.08562000  | -1.95831400 | -0.30697500 |

|     |             |             |             |   |             |             |             |   |             |             |             |
|-----|-------------|-------------|-------------|---|-------------|-------------|-------------|---|-------------|-------------|-------------|
| H   | -1.23780500 | 4.34694300  | -3.01232400 | C | 2.52582800  | 3.35495600  | 0.80621200  | C | 0.28379700  | -3.01041300 | -0.08024200 |
| C   | 6.07808200  | -2.16973100 | -2.35007200 | H | 3.03991200  | 2.85129700  | 1.62958700  | C | 3.51665400  | 0.28942500  | 2.05502100  |
| C   | 4.74061800  | -2.52370300 | -2.18436800 | C | 1.65370200  | 2.63251100  | -0.02221500 | H | 2.91680300  | 0.70593600  | 2.86886900  |
| C   | 4.22908700  | -2.79618100 | -0.91023500 | C | -0.86308800 | -2.37114800 | 0.53084100  | C | 2.03928300  | -2.70116700 | -1.68091800 |
| C   | 5.08515700  | -2.70496400 | 0.19235600  | C | 2.99545800  | 0.21828400  | 0.75312300  | C | -2.27768300 | -0.79585100 | 1.01889800  |
| C   | 6.42441900  | -2.35408600 | 0.02899400  | C | 2.74754000  | 4.71193300  | 0.58970300  | C | -4.37531100 | -0.68953400 | 2.83143000  |
| C   | 6.92504100  | -2.08407000 | -1.24446800 | H | 3.42959200  | 5.26015500  | 1.24362900  | H | -5.21075600 | -0.62406600 | 3.53172000  |
| H   | 6.46248200  | -1.95389000 | -3.35008500 | C | -2.99353700 | 0.39765500  | 1.14062100  | C | 5.07280400  | -0.78451400 | 0.00811400  |
| H   | 4.06659500  | -2.57357400 | -3.04334700 | H | -2.73221200 | 1.26527800  | 0.53074000  | H | 5.66767900  | -1.21487200 | -0.80078900 |
| H   | 4.68938200  | -2.89376300 | 1.19618700  | C | 0.42711900  | -0.28327600 | 2.70227700  | C | -0.99720100 | 1.95793300  | 3.54177800  |
| H   | 7.07823300  | -2.27888400 | 0.90156900  | H | 0.98734900  | -1.16648600 | 2.37623000  | H | -1.55495400 | 2.83937800  | 3.86699500  |
| H   | 7.97208200  | -1.80020800 | -1.37427700 | C | 1.30986500  | 0.32257900  | -2.56959900 | C | -3.66303000 | -1.88226300 | 2.73541200  |
| C   | 2.77856600  | -3.16510800 | -0.73976800 | C | 0.46823200  | 0.88944900  | 1.93147100  | H | -3.91705300 | -2.74909200 | 3.34846900  |
| H   | 2.66824500  | -4.26295600 | -0.84937300 | C | -0.32747300 | -0.33530900 | 3.86987600  | C | -2.60895000 | -1.91034800 | 1.82419500  |
| H   | 2.48845400  | -2.95176500 | 0.31530500  | H | -0.35916400 | -1.25850300 | 4.45448000  | C | 5.58346600  | -0.71334600 | 1.30267600  |
| O   | 1.93635600  | -2.53001800 | -1.65060300 | C | -0.24905200 | 2.00992000  | 2.36492300  | H | 6.58876200  | -1.08290300 | 1.51895700  |
| H   | 0.74625000  | -2.09121300 | -0.93723300 | H | -0.22995900 | 2.93202400  | 1.77667700  | C | 4.80315500  | -0.17319900 | 2.32509900  |
|     |             |             |             | C | -4.04179100 | 0.43188000  | 2.05130900  | H | 5.19588200  | -0.11378200 | 3.34307900  |
| TS5 |             |             |             | H | -4.62445200 | 1.34938100  | 2.16014400  | C | 2.10632800  | 5.36751000  | -0.46234900 |
| P   | 1.32667900  | 0.85130700  | 0.31232600  | C | 2.44988200  | -4.05490800 | -1.36498600 | H | 2.28546800  | 6.43113900  | -0.63575000 |
| O   | 1.99951700  | 0.80788700  | -3.36432800 | C | 3.78813500  | -0.31932300 | -0.26781800 | C | 1.77136100  | -4.83898700 | -0.46877900 |
| O   | 2.59910200  | -2.01080400 | -2.53539500 | H | 3.39831300  | -0.41554200 | -1.28403900 | H | 2.09834200  | -5.86388500 | -0.27370800 |
| N   | -1.20646800 | -1.12857300 | 0.21956100  | C | 0.64190500  | -4.32316500 | 0.19361700  | C | 1.01870600  | 3.29909300  | -1.07553900 |
| N   | -1.68772000 | -2.88330200 | 1.49108600  | H | 0.05926000  | -4.93583200 | 0.88339000  | H | 0.34494700  | 2.74540600  | -1.73482200 |
| H   | -1.62890000 | -3.81547200 | 1.87737000  | C | -1.04554700 | 0.78563800  | 4.29157600  | C | 1.24391500  | 4.65824400  | -1.29470200 |
| N   | 0.96264000  | -2.20361500 | -0.93741200 | H | -1.64417600 | 0.74139200  | 5.20436200  | H | 0.74564600  | 5.16168400  | -2.12624300 |

|     |             |             |             |   |             |             |             |   |             |             |             |
|-----|-------------|-------------|-------------|---|-------------|-------------|-------------|---|-------------|-------------|-------------|
| Ru  | 0.11107700  | -0.26816700 | -1.29978400 | C | 5.45917800  | -0.66458300 | 0.49204000  | H | 2.59602000  | 4.97846600  | 2.62363800  |
| C   | -3.95414700 | -0.39763200 | -1.86291000 | H | 5.31538500  | -0.67422500 | 1.57717700  | C | -1.52387700 | 0.50862800  | 0.79304700  |
| C   | -3.06300800 | 0.62643800  | -2.19147300 | C | 4.35280400  | -0.50113500 | -0.35655900 | C | 2.45635900  | -1.27827300 | 3.04268700  |
| C   | -3.48528500 | 1.95840500  | -2.12087900 | C | -0.98449500 | 1.68066900  | 0.13353000  | H | 2.34733100  | -0.24980000 | 3.39425400  |
| C   | -4.77807600 | 2.26485300  | -1.70471100 | C | 2.69455000  | -1.54214800 | 1.68912900  | C | -1.15250700 | -1.75203600 | 1.16491400  |
| C   | -5.66348900 | 1.23746100  | -1.36980100 | C | 6.73736700  | -0.81446600 | -0.03750200 | C | 0.44781900  | 2.86659200  | -0.97398000 |
| C   | -5.25103300 | -0.09206000 | -1.45554600 | H | 7.59179400  | -0.93966900 | 0.63182200  | C | 0.57825800  | 5.57944200  | -1.49451400 |
| H   | -3.60146000 | -1.42965300 | -1.93092200 | C | 1.53083000  | 3.34432400  | -1.71687300 | H | 0.65143000  | 6.64591500  | -1.71843800 |
| H   | -2.78665100 | 2.76005000  | -2.38507700 | H | 2.29617800  | 2.65262000  | -2.07682800 | C | 2.79354800  | -3.91582600 | 2.20183300  |
| H   | -5.10097800 | 3.30707100  | -1.64556100 | C | 1.69542000  | 1.75335400  | 2.00448100  | H | 2.93223900  | -4.94594000 | 1.86587300  |
| H   | -6.67947600 | 1.47637600  | -1.04617300 | H | 0.87606100  | 1.05454000  | 2.20148900  | C | 3.72471400  | 3.56978500  | 1.43834700  |
| H   | -5.94439400 | -0.89618800 | -1.19664100 | C | 1.27110600  | -2.04248900 | -1.67252600 | H | 4.51964500  | 4.28187300  | 1.20454400  |
| C   | -1.67304700 | 0.27814900  | -2.64818400 | C | 2.77471200  | 1.34770000  | 1.20059200  | C | -0.50424500 | 5.11649800  | -0.75255800 |
| H   | -0.95024500 | 1.02842900  | -1.59590100 | C | 1.63578600  | 3.04390600  | 2.52022600  | H | -1.27948300 | 5.79376300  | -0.39026400 |
| O   | -1.33432500 | -0.96888300 | -2.70846900 | H | 0.78320700  | 3.34154500  | 3.13604100  | C | -0.54932100 | 3.74702100  | -0.49264800 |
| H   | -1.31335400 | 0.95643800  | -3.45919500 | C | 3.78868700  | 2.27382200  | 0.92432000  | C | 2.53281500  | -3.64445900 | 3.54607600  |
| H   | 3.32083800  | -4.42781300 | -1.90650400 | H | 4.63080500  | 1.98970100  | 0.28767400  | H | 2.46249200  | -4.46132500 | 4.26783300  |
|     |             |             |             | C | 1.58116300  | 4.71018900  | -1.96493000 | C | 2.37039200  | -2.32549300 | 3.96213200  |
| TS6 |             |             |             | H | 2.41249500  | 5.12227700  | -2.54082200 | H | 2.18119400  | -2.10258800 | 5.01502600  |
| P   | 2.67606500  | -0.27495900 | 0.35452600  | C | -2.24173700 | -1.81906700 | 2.04887600  | C | 6.92548100  | -0.80977900 | -1.42135000 |
| O   | 1.59523100  | -3.06433900 | -2.14157500 | H | -2.47770400 | -2.77443600 | 2.51769200  | H | 7.92857000  | -0.93284000 | -1.83674400 |
| O   | -0.45087200 | -2.84871700 | 0.92404600  | C | 2.86956900  | -2.87583000 | 1.28154000  | C | -2.98215200 | -0.67019900 | 2.27660600  |
| N   | 0.13351400  | 1.59089500  | -0.57336500 | H | 3.06498900  | -3.10323700 | 0.22807400  | H | -3.84584000 | -0.69546200 | 2.94439900  |
| N   | -1.42738300 | 2.96577200  | 0.23157500  | C | -2.62455400 | 0.52164100  | 1.64424800  | C | 4.54922000  | -0.50107200 | -1.74094300 |
| H   | -2.41832300 | 3.17844000  | 0.38579000  | H | -3.19712400 | 1.43718800  | 1.79130200  | H | 3.68459300  | -0.38601800 | -2.40054400 |
| N   | -0.79460200 | -0.61516800 | 0.55574800  | C | 2.64966300  | 3.95990100  | 2.23260800  | C | 5.83176100  | -0.65517300 | -2.26986300 |

|    |             |             |             |                  |             |             |             |   |             |             |             |
|----|-------------|-------------|-------------|------------------|-------------|-------------|-------------|---|-------------|-------------|-------------|
| H  | 5.97319900  | -0.65938200 | -3.35305700 | C                | -2.69881300 | -4.46152600 | -1.97193700 | H | -3.10963300 | 0.52782400  | -2.26701600 |
| Ru | 0.80967100  | -0.39306500 | -1.02875400 | H                | -3.88317700 | -3.89761700 | -0.25415600 | C | -2.87241800 | 1.90701900  | 1.38048400  |
| H  | 1.69128100  | 0.14492900  | -2.25464100 | H                | -3.49744700 | -1.44203000 | -0.59062900 | H | -2.30716200 | 1.35440700  | 2.13880800  |
| H  | 0.23768200  | -2.61781500 | 0.26622700  | H                | -1.06441100 | -2.28166700 | -4.02263400 | C | 1.65981900  | 0.46927900  | -1.14199200 |
| H  | -0.50319500 | -0.28121100 | -2.15965000 | H                | -1.45305900 | -4.72083200 | -3.71976600 | C | -2.19829400 | 2.46339500  | 0.28225900  |
| C  | -6.58004100 | -1.13360600 | 1.72275300  | H                | -2.85567100 | -5.53327300 | -1.82866400 | C | -4.25152900 | 2.04240800  | 1.50730100  |
| C  | -6.68258300 | 0.11226400  | 2.34188600  | C                | -2.04142100 | -0.24725900 | -2.49119300 | H | -4.76447700 | 1.59779900  | 2.36400900  |
| C  | -6.31547900 | 1.26687400  | 1.65015600  | O                | -2.66052600 | 0.58298800  | -1.79236100 | C | -2.93490000 | 3.16587300  | -0.67907400 |
| C  | -5.84932700 | 1.19620100  | 0.33236000  | H                | -1.69687400 | 0.03796500  | -3.51501600 | H | -2.42581500 | 3.60548700  | -1.54180700 |
| C  | -5.74776300 | -0.06067200 | -0.27597400 |                  |             |             |             | C | -5.12584400 | -0.20514000 | -1.87173800 |
| C  | -6.10811200 | -1.21736800 | 0.41229600  | TS7 <sub>a</sub> |             |             |             | H | -5.56513900 | 0.27487200  | -2.74886200 |
| H  | -6.87259500 | -2.03920200 | 2.25993200  | P                | -0.41429500 | 2.11064500  | 0.05871800  | C | 1.66580900  | -2.44100400 | 2.82718700  |
| H  | -7.05605100 | 0.18605800  | 3.36648800  | O                | 2.71468900  | 0.79819900  | -1.51025300 | C | 1.54171000  | 1.97752600  | 2.03348500  |
| H  | -6.40166200 | 2.24375600  | 2.13675800  | O                | 2.57579900  | -0.92100100 | 1.25052600  | H | 2.02725200  | 1.26985600  | 1.35675600  |
| H  | -5.37023800 | -0.13095900 | -1.30102600 | N                | -1.96789300 | -0.73349800 | 0.00339900  | C | -0.70792900 | -2.75261500 | 2.82314100  |
| H  | -6.02445500 | -2.18874100 | -0.08187800 | N                | -3.26039100 | -1.93656100 | 1.34878600  | H | -1.60513600 | -3.26722800 | 3.17203100  |
| C  | -5.41559600 | 2.43067200  | -0.41184800 | H                | -3.51432600 | -2.60315000 | 2.06503200  | C | -4.97856000 | 2.73955900  | 0.54060700  |
| H  | -5.82945500 | 2.41201600  | -1.43723800 | N                | 0.31066300  | -1.15467800 | 1.32008100  | H | -6.06208100 | 2.84033600  | 0.63717100  |
| H  | -5.82739600 | 3.32708000  | 0.07582300  | C                | 0.28781200  | 4.77746000  | -0.53839900 | C | -0.77584600 | -1.80752300 | 1.80531200  |
| O  | -4.01557200 | 2.59492200  | -0.45037300 | H                | 0.10852100  | 4.98124900  | 0.52055800  | C | -0.30364200 | 3.43605300  | 2.58894100  |
| H  | -3.61686000 | 1.89556800  | -1.01220100 | C                | 0.14749800  | 3.47435100  | -1.03841700 | H | -1.26460600 | 3.89530700  | 2.33990500  |
| C  | -3.27612000 | -3.54481800 | -1.09343900 | C                | -1.99679400 | -1.49519700 | 1.08789900  | C | 1.53187700  | -1.49134700 | 1.78565500  |
| C  | -3.06700200 | -2.17927800 | -1.27344500 | C                | 0.31076900  | 2.55090600  | 1.68971100  | C | -3.25242200 | -0.68466600 | -0.48406800 |
| C  | -2.27226400 | -1.71789600 | -2.32606200 | C                | 0.66259600  | 5.82093000  | -1.38077700 | C | -5.95222000 | -0.96813000 | -1.02526000 |
| C  | -1.70353900 | -2.64194300 | -3.20979000 | H                | 0.77127000  | 6.83004500  | -0.97663600 | H | -7.01329200 | -1.06646500 | -1.26419600 |
| C  | -1.91339800 | -4.00567500 | -3.03407900 | C                | -3.76855900 | -0.05267700 | -1.61743100 | C | 2.14490000  | 2.27972800  | 3.25270300  |

|    |             |             |             |   |             |             |             |                  |             |             |             |
|----|-------------|-------------|-------------|---|-------------|-------------|-------------|------------------|-------------|-------------|-------------|
| H  | 3.10154400  | 1.81581300  | 3.50469400  | H | -1.60149600 | -2.39952000 | -2.85009500 | H                | 2.67114900  | -2.67008800 | 3.18267100  |
| C  | -4.31666000 | 3.30507700  | -0.54710800 | H | -3.88840000 | -3.37456600 | -2.79405200 |                  |             |             |             |
| H  | -4.87920400 | 3.85578400  | -1.30477000 | H | -4.46042900 | -5.11962500 | -1.10969500 | TS7 <sub>b</sub> |             |             |             |
| C  | -5.45079300 | -1.60693300 | 0.10524100  | H | -2.72534100 | -5.89413000 | 0.50585900  | P                | -0.15261400 | 2.05460900  | 0.03311800  |
| H  | -6.09209100 | -2.20814500 | 0.75237800  | H | -0.41194500 | -4.89828200 | 0.42021900  | O                | 2.45512300  | 0.32072900  | -2.25086300 |
| C  | -4.08965700 | -1.45126800 | 0.35750400  | C | 0.53529400  | -3.03584600 | -1.24187800 | O                | 2.40569300  | -1.38993700 | 0.61679700  |
| C  | 1.52713400  | 3.15686400  | 4.14315900  | O | 1.32974600  | -3.48998600 | -0.30327400 | N                | -2.13348800 | -0.52964300 | -0.06008000 |
| H  | 1.99729200  | 3.38897900  | 5.10181700  | H | 0.93201800  | -3.06860500 | -2.28980700 | N                | -3.43806700 | -1.51107300 | 1.45106500  |
| C  | 0.30293700  | 3.73547400  | 3.80793900  | C | 7.06789500  | 0.18659900  | -1.73354500 | H                | -3.71074900 | -2.12581700 | 2.20533900  |
| H  | -0.18676700 | 4.42415300  | 4.50071100  | C | 7.80012100  | 0.01854000  | -0.55794000 | N                | 0.17411800  | -1.34313100 | 0.94526400  |
| C  | 0.90499400  | 5.57709200  | -2.73277600 | C | 7.35666400  | -0.88851600 | 0.40352200  | C                | 0.32250300  | 4.78583300  | -0.51069000 |
| H  | 1.20468600  | 6.39537700  | -3.39176300 | C | 6.19479800  | -1.62868000 | 0.18896500  | H                | 0.28002300  | 4.92731300  | 0.57343700  |
| C  | 0.54902400  | -3.06276300 | 3.34784500  | C | 5.45759000  | -1.47030100 | -0.98938000 | C                | 0.16064700  | 3.50345800  | -1.05678200 |
| H  | 0.64791300  | -3.80443700 | 4.14317900  | C | 5.90422100  | -0.54900700 | -1.94347500 | C                | -2.15914500 | -1.28994100 | 1.02404000  |
| C  | 0.39578700  | 3.23814900  | -2.39578100 | H | 7.39872100  | 0.90620100  | -2.48655700 | C                | 1.08026600  | 2.31988700  | 1.37750000  |
| H  | 0.29391400  | 2.22377200  | -2.78918500 | H | 8.70963600  | 0.60004300  | -0.38855000 | C                | 0.53997500  | 5.88386500  | -1.33789400 |
| C  | 0.77140900  | 4.28512100  | -3.23695200 | H | 7.92080300  | -1.02137000 | 1.33038100  | H                | 0.66333600  | 6.87739900  | -0.90025200 |
| H  | 0.96680700  | 4.08518900  | -4.29291800 | H | 5.83999700  | -2.33754700 | 0.94068300  | C                | -3.97732800 | 0.49621800  | -1.42758300 |
| Ru | -0.01984700 | -0.01929300 | -0.60731000 | H | 5.31845300  | -0.39508800 | -2.85455700 | H                | -3.31068200 | 0.96788900  | -2.15342700 |
| H  | 2.61406400  | -3.13315600 | -0.25523600 | C | 4.22560300  | -2.29159300 | -1.24312100 | C                | -2.10760100 | 1.80904900  | 2.01669800  |
| C  | -1.84669300 | -3.18381400 | -2.12427200 | O | 3.61557800  | -2.70457800 | -0.04986000 | H                | -1.37005000 | 1.18124600  | 2.52887500  |
| C  | -3.12960400 | -3.72370300 | -2.08827900 | H | 3.53034200  | -1.71407000 | -1.88394700 | C                | 1.43568500  | 0.16727900  | -1.69840000 |
| C  | -3.45275600 | -4.69611300 | -1.13804500 | H | 4.50253500  | -3.18589800 | -1.83744400 | C                | -1.75052000 | 2.46755600  | 0.82775900  |
| C  | -2.48205000 | -5.12303300 | -0.23153500 | H | 3.17117900  | -1.66467000 | 0.71988100  | C                | -3.39075800 | 1.93538000  | 2.53992500  |
| C  | -1.19600900 | -4.58113800 | -0.27195200 | H | 0.35624500  | -1.84031200 | -1.20410600 | H                | -3.65340000 | 1.41342700  | 3.46415800  |
| C  | -0.86754800 | -3.60586400 | -1.21746500 | H | -0.55566100 | 0.43195000  | -2.05686100 | C                | -2.70942000 | 3.25872200  | 0.18376700  |



|   |             |             |             |    |             |             |             |     |             |             |             |
|---|-------------|-------------|-------------|----|-------------|-------------|-------------|-----|-------------|-------------|-------------|
| H | -2.45379900 | 3.77140300  | -0.74840100 | C  | 1.81536800  | 3.26754400  | 3.48892700  | C   | 7.18880800  | 0.08728900  | 0.38297500  |
| C | -5.36076800 | 0.59286500  | -1.50298100 | H  | 1.60450400  | 3.87478600  | 4.37280100  | C   | 6.90922300  | -1.16490000 | 0.93014500  |
| H | -5.81703900 | 1.16121000  | -2.31621700 | C  | 0.60632100  | 5.71414900  | -2.72222000 | C   | 5.98831800  | -2.01047500 | 0.31340600  |
| C | 1.49422000  | -2.85296400 | 2.26661700  | H  | 0.78255100  | 6.57559000  | -3.37095300 | C   | 5.33222300  | -1.61566000 | -0.85891600 |
| C | 2.33909100  | 1.71948400  | 1.23438900  | C  | 0.36813400  | -3.27778000 | 2.95160100  | C   | 5.61200000  | -0.35401800 | -1.39613300 |
| H | 2.55178600  | 1.09503700  | 0.36467300  | H  | 0.45298000  | -4.03126700 | 3.73715900  | H   | 6.73759800  | 1.47442800  | -1.21075600 |
| C | -0.87557300 | -2.74626000 | 2.61274000  | C  | 0.22939700  | 3.34225400  | -2.44454900 | H   | 7.90997800  | 0.75063000  | 0.86677200  |
| H | -1.78761700 | -3.09519700 | 3.10030500  | H  | 0.10438800  | 2.34293200  | -2.86975300 | H   | 7.41385000  | -1.48713500 | 1.84467400  |
| C | -4.34203500 | 2.72105900  | 1.88478300  | C  | 0.45245500  | 4.44373500  | -3.27214500 | H   | 5.76339200  | -2.98959800 | 0.74367600  |
| H | -5.35261400 | 2.81205800  | 2.28998700  | H  | 0.50877500  | 4.30401400  | -4.35422100 | H   | 5.08200000  | -0.02378900 | -2.29269000 |
| C | -0.92900600 | -1.80514100 | 1.58645600  | Ru | -0.18226100 | -0.07634400 | -0.90788900 | C   | 4.34302600  | -2.52893200 | -1.52527500 |
| C | 0.82987300  | 3.09974300  | 2.51655300  | H  | 2.80132700  | -3.57060000 | -0.91909900 | O   | 3.68603600  | -3.32771200 | -0.55637100 |
| H | -0.14465000 | 3.57798900  | 2.65203600  | C  | -2.44258500 | -3.11448500 | -2.02843800 | H   | 3.61674500  | -1.92927300 | -2.10091100 |
| C | 1.36511300  | -1.86673200 | 1.26874300  | C  | -3.71250900 | -3.49486100 | -1.60838700 | H   | 4.86432800  | -3.17855300 | -2.25598700 |
| C | -3.44037300 | -0.24274600 | -0.36970500 | C  | -3.85867800 | -4.34896100 | -0.51007900 | H   | 3.04570900  | -2.12723400 | 0.41009800  |
| C | -6.19445000 | -0.02871000 | -0.55305600 | C  | -2.72790500 | -4.81789500 | 0.15881900  | H   | -0.18695900 | -1.61136400 | -1.71213300 |
| H | -7.27777600 | 0.06964100  | -0.65074000 | C  | -1.45557500 | -4.42977800 | -0.26195300 | H   | -0.83026300 | 0.52637600  | -2.25000400 |
| C | 3.32336200  | 1.89013500  | 2.20525100  | C  | -1.30268200 | -3.57240100 | -1.35510500 | H   | 2.48570300  | -3.25096700 | 2.48838400  |
| H | 4.29405300  | 1.40464800  | 2.07373100  | H  | -2.32202000 | -2.41812000 | -2.86532000 | H   | 0.16468600  | -2.98606600 | -2.88533100 |
| C | -3.99506900 | 3.38582300  | 0.71130900  | H  | -4.59656400 | -3.11621600 | -2.12876500 |     |             |             |             |
| H | -4.73386500 | 4.00113400  | 0.19202000  | H  | -4.85779400 | -4.65013100 | -0.18268300 | TS8 |             |             |             |
| C | -5.67532900 | -0.76991200 | 0.50434600  | H  | -2.83714000 | -5.49623100 | 1.01044200  | P   | 1.86319400  | 0.29873300  | 0.01306800  |
| H | -6.32640300 | -1.25591000 | 1.23356500  | H  | -0.55219000 | -4.77721300 | 0.24653200  | O   | 1.78479900  | -2.23997200 | -2.78145300 |
| C | -4.28651100 | -0.86418500 | 0.57843800  | C  | 0.07826500  | -3.17783600 | -1.78846200 | O   | -0.29577500 | -3.71309200 | -0.31427600 |
| C | 3.06295100  | 2.66273200  | 3.33674100  | O  | 1.07038000  | -3.54922000 | -1.13262100 | N   | -1.36793100 | 0.92955700  | -0.19703600 |
| H | 3.83096200  | 2.79216600  | 4.10320900  | C  | 6.53590000  | 0.48975100  | -0.78203500 | N   | -2.63269400 | 1.35838200  | 1.58304000  |

|   |             |             |             |   |             |             |             |    |             |             |             |
|---|-------------|-------------|-------------|---|-------------|-------------|-------------|----|-------------|-------------|-------------|
| H | -3.17404400 | 1.17585000  | 2.41700400  | C | 3.76112400  | -3.42038400 | 2.04569800  | C  | 0.56251900  | 3.77715300  | 1.69308800  |
| N | -0.88030000 | -1.62027800 | 0.43355100  | H | 4.18252300  | -4.32326400 | 2.49322200  | H  | 0.15136300  | 4.70909600  | 1.29608300  |
| C | 1.62423400  | 1.39329600  | 2.68161900  | C | -1.48906600 | -0.88056800 | 1.39683200  | Ru | 0.02227800  | -0.35122100 | -1.27087200 |
| H | 2.06620400  | 0.47975900  | 3.08535900  | C | 3.38738900  | 1.07473900  | -2.23625900 | C  | -3.87696300 | -0.22282800 | -1.72272900 |
| C | 1.48277500  | 1.55959200  | 1.29852000  | H | 2.59216900  | 0.61471500  | -2.82771100 | C  | -4.85561200 | 0.18848000  | -0.82369100 |
| C | -1.81484200 | 0.46044700  | 0.95833300  | C | -0.69710800 | -2.93321300 | 0.65848000  | C  | -5.26902300 | -0.67168200 | 0.19921900  |
| C | 3.28301700  | 1.09469500  | -0.84198800 | C | -1.94128000 | 2.16607800  | -0.36429700 | C  | -4.70440200 | -1.94376100 | 0.30533500  |
| C | 1.22229100  | 2.40214000  | 3.56002400  | C | -3.36551700 | 4.53563300  | -0.20063700 | C  | -3.72176500 | -2.35058200 | -0.59682000 |
| H | 1.34266100  | 2.25709300  | 4.63656900  | H | -3.91888200 | 5.47631300  | -0.16345000 | C  | -3.28665900 | -1.48744900 | -1.60795400 |
| C | -1.83233400 | 3.07774000  | -1.41857300 | C | 5.40112000  | 2.27190500  | -0.71892400 | H  | -3.53122600 | 0.45485500  | -2.51066200 |
| H | -1.20019000 | 2.84232000  | -2.27791300 | H | 6.18602400  | 2.74252400  | -0.12204100 | H  | -5.29631200 | 1.18544600  | -0.91706700 |
| C | 3.87577700  | -1.64030400 | 0.41249000  | C | 2.56170600  | -2.89360300 | 2.52397300  | H  | -6.04409900 | -0.35431900 | 0.90237800  |
| H | 4.39712200  | -1.16853400 | -0.42423500 | H | 2.03538900  | -3.38159200 | 3.34853700  | H  | -5.03567800 | -2.62589800 | 1.09327200  |
| C | 1.09136100  | -1.51112900 | -2.19398100 | C | -3.47985600 | 3.64045900  | 0.85874000  | H  | -3.27245600 | -3.34626300 | -0.53683800 |
| C | 2.67608700  | -1.09280900 | 0.89178700  | H | -4.10931200 | 3.85902600  | 1.72332600  | C  | -2.22968100 | -1.94192300 | -2.56990700 |
| C | 4.41065900  | -2.79314700 | 0.98466500  | C | -2.75580500 | 2.45358300  | 0.75592800  | O  | -1.63707700 | -3.03095100 | -2.43704700 |
| H | 5.34342400  | -3.20486200 | 0.59262500  | C | 5.50128900  | 2.24248000  | -2.11140700 | H  | -0.68940600 | -3.39735500 | -1.19282300 |
| C | 2.01860400  | -1.74921600 | 1.94564100  | H | 6.36629600  | 2.68990400  | -2.60688400 | H  | -1.22371300 | -0.68821400 | -2.39811900 |
| H | 1.06576100  | -1.36535200 | 2.32152700  | C | 4.49526700  | 1.64399100  | -2.86645100 | H  | 0.41758100  | 0.77871000  | -2.33803000 |
| C | -2.55587600 | 4.25955600  | -1.31991600 | H | 4.56811300  | 1.61935700  | -3.95613000 | H  | -0.72518900 | -4.55888700 | 2.06977000  |
| H | -2.50057700 | 4.99294000  | -2.12697800 | C | 0.68440300  | 3.59110000  | 3.07166200  | H  | -2.36795300 | -1.51829400 | -3.59426200 |
| C | -0.93909300 | -3.49885100 | 1.93048400  | H | 0.37107000  | 4.37764400  | 3.76233400  |    |             |             |             |
| C | 4.29991700  | 1.70063600  | -0.08817400 | C | -1.47622100 | -2.71281900 | 2.93326500  |    |             |             |             |
| H | 4.22843100  | 1.72151300  | 1.00396800  | H | -1.68129000 | -3.13879400 | 3.91772000  |    |             |             |             |
| C | -1.79159800 | -1.37783000 | 2.66115800  | C | 0.95654300  | 2.77026800  | 0.81811100  |    |             |             |             |
| H | -2.25138300 | -0.74116400 | 3.41904100  | H | 0.85003900  | 2.91573600  | -0.26201000 |    |             |             |             |
